# Supplementary material
Source: HighWire-hosted journal article supplement (https://gut.bmj.com/content/gutjnl-2018-317208)
Supplement: inline-supplementary-material-6 [file inline-supplementary-material-6.xlsx]

## Sheet: Cluster 1
Supplementary Table 4: Generated GO Terms (biological processes) from gene expression cluster 1, p < 0.001, count ≥ 5
Term	Count	-LOG10(p-value)	Genes
GO:0006796~phosphate metabolic process	111	5.71678	TBK1, ATP6AP1, STK35, TIRAP, CASK, TGFB1, PRKX, CSNK2A1, PIK3CA, MLKL, MAP2K5, EGFR, PTPRK, BCR, CSNK1G1, PIK3CB, STK24, WNK1, PIM1, MARK3, PTPRN, STK4, MARK2, MAPK6, SCYL2, RIPK4, LRRK2, LRRK1, NEK7, SSH3, SSH2, STK17B, DUSP11, UHMK1, SRC, IRAK4, LIF, DUSP16, DYRK3, DYRK2, STK38L, GPD2, MAP2K1, SMAD7, PTPN2, TAOK3, MAP2K4, MUL1, OXSR1, EPHA2, ATM, PTPN11, PLK3, IKBKB, ABL2, CDC42BPB, CDK17, HTAT…
GO:0006793~phosphorus metabolic process	111	5.71678	TBK1, ATP6AP1, STK35, TIRAP, CASK, TGFB1, PRKX, CSNK2A1, PIK3CA, MLKL, MAP2K5, EGFR, PTPRK, BCR, CSNK1G1, PIK3CB, STK24, WNK1, PIM1, MARK3, PTPRN, STK4, MARK2, MAPK6, SCYL2, RIPK4, LRRK2, LRRK1, NEK7, SSH3, SSH2, STK17B, DUSP11, UHMK1, SRC, IRAK4, LIF, DUSP16, DYRK3, DYRK2, STK38L, GPD2, MAP2K1, SMAD7, PTPN2, TAOK3, MAP2K4, MUL1, OXSR1, EPHA2, ATM, PTPN11, PLK3, IKBKB, ABL2, CDC42BPB, CDK17, HTAT…
GO:0006468~protein amino acid phosphorylation	83	5.23554	CDK17, HTATIP2, TBK1, CCNT1, STK35, TIRAP, CASK, TGFB1, PRKX, CSNK2A1, SLK, PAK2, PAK4, CDK12, PIK3CA, TGFA, MLKL, BRD4, SIK2, CHUK, MAP2K5, PRKCA, EGFR, BCR, CSNK1G1, STK24, PIM1, PRKCI, WNK1, MINK1, CDK9, CDK6, MARK3, CDK5, STK4, SRPK1, MARK2, GAK, STYK1, MAST2, MAPK6, HIPK1, SCYL2, CFL1, CDK11B, RIPK4, LRRK2, LRRK1, NEK7, ACVR1, FRK, STK17B, UHMK1, SRC, IRAK4, LIF, PTK2B, MAP3K2, CAMK2D, DYRK3…
GO:0016310~phosphorylation	92	5.10023	CDK17, HTATIP2, TBK1, ATP6AP1, CCNT1, STK35, TIRAP, CASK, TGFB1, PRKX, CSNK2A1, SLK, PAK2, PAK4, CDK12, PIK3CA, TGFA, MLKL, BRD4, SIK2, CHUK, MAP2K5, PRKCA, EGFR, BCR, CSNK1G1, PIK3CB, PIK3C2A, STK24, PIM1, PRKCI, WNK1, CDK9, MINK1, CDK6, MARK3, CDK5, STK4, SRPK1, MARK2, GAK, ATP6V1C1, STYK1, MAST2, HIPK1, MAPK6, SCYL2, CFL1, CDK11B, RIPK4, LRRK2, LRRK1, NEK7, ACVR1, FRK, STK17B, UHMK1, SRC, IRAK…
GO:0001701~in utero embryonic development	43	4.03648	GRB2, INTS1, BCL2L1, YBX1, LIF, SBDS, LY6E, TEAD4, ANKRD11, KRT8, PLCD3, GATAD2A, SKIL, RUNX1, CYR61, ERCC2, MAFG, EGFR, MAP2K1, MYO1E, SMAD3, ICMT, LIG4, MBNL1, MYH9, CAPN2, UBE2B, JUNB, NCKAP1, MFN2, NMT1, WNT7B, KRT19, RDH10, HIF1A, PSMC4, ZMIZ1, NCOA6, ATP6V0A1, HBEGF, CDK11B, ACVR1, MED1
GO:0006811~ion transport	53	3.50635	SLC22A18, SLC20A1, ATP1B3, ATP6AP1, ANO1, SLC26A2, SHKBP1, SLC23A2, SLC4A2, MCOLN1, SLC4A4, ANO10, SLCO4A1, SLC22A23, STIM2, WNK1, STIM1, ATP6V1C1, ATP2C1, STEAP2, ORAI1, SLC39A13, SLC38A7, SFXN3, CACNB3, ATP6V1G1, CAMK2D, SLC4A7, SLC39A4, SLC30A9, ARL6IP5, TES, SCO1, SLC39A1, TCIRG1, CNNM4, SLC12A2, HTT, NIPA2, ITPR3, ATP13A3, KCTD5, VDAC2, SLC4A11, LASP1, ATP6V0A1, ABCC4, CHRNB1, CP, KCTD13, CL…
GO:0009792~embryonic development ending in birth or egg hatching	53	3.29432	INTS1, YBX1, SBDS, ANKRD11, CHST11, DLG1, CYR61, EGFR, VEZT, LIG4, MBNL1, MYH9, UBE2B, JUNB, MFN2, KRT19, HIF1A, ZMIZ1, CFL1, NCOA6, TGIF1, CDK11B, MED1, ACVR1, GRB2, BCL2L1, LIF, LY6E, TEAD4, KRT8, PLCD3, GATAD2A, SKIL, RUNX1, ACSL4, ERCC2, HECTD1, MAFG, MAP2K1, HTT, MYO1E, SMAD3, ICMT, CAPN2, EPHA2, ATM, NCKAP1, NMT1, RDH10, WNT7B, PSMC4, ATP6V0A1, HBEGF
GO:0016265~death	66	3.29122	HTATIP2, CADM1, ZMAT3, PMAIP1, PAWR, UBQLN1, CIAPIN1, TGFB1, SMNDC1, PDCD2, CASP3, UNC5B, PAK2, SLK, BAG2, SPR, MYC, CUL1, SGPL1, LTBR, GAN, IL24, LIG4, STK4, CDK5, SLTM, TAF10, PDCL3, ZDHHC16, KRT18, TNFRSF10B, CDK11B, PDCD6IP, TNFAIP3, PHLPP1, TNFRSF21, LITAF, TNFRSF12A, CLU, MMD, STK17B, BCL2L1, GRAMD4, SERPINB9B, TNFRSF1B, SH3GLB1, KRT8, GATAD2A, FAIM, DYRK2, TRAF4, ERCC2, TRAF3, VAC14, HTT, …
GO:0007173~epidermal growth factor receptor signaling pathway	7	3.25076	EGFR, EREG, BCAR1, TGFA, HBEGF, SOCS5, SRC
GO:0051056~regulation of small GTPase mediated signal transduction	33	3.22305	RALGAPB, RASGEF1B, ASAP2, CYTH2, ITSN2, TBC1D19, IQGAP1, RGL2, PLEKHG3, KRAS, TBC1D12, SOS1, PAFAH1B1, BCL6, RAPGEF2, FGD6, RASA1, FGD3, ALS2CL, TBC1D2, RASA2, GIT1, BCR, ARHGEF1, ARHGEF18, ARHGEF5, ICMT, RICTOR, FARP1, TBC1D25, RALGAPA2, ACAP2, ARAP2
GO:0043009~chordate embryonic development	52	3.15965	INTS1, YBX1, SBDS, ANKRD11, CHST11, DLG1, CYR61, EGFR, VEZT, LIG4, MBNL1, MYH9, UBE2B, JUNB, MFN2, KRT19, HIF1A, ZMIZ1, CFL1, NCOA6, TGIF1, CDK11B, MED1, ACVR1, GRB2, BCL2L1, LIF, LY6E, TEAD4, KRT8, PLCD3, GATAD2A, SKIL, RUNX1, ERCC2, HECTD1, MAFG, MAP2K1, HTT, MYO1E, SMAD3, ICMT, CAPN2, ATM, EPHA2, NCKAP1, NMT1, RDH10, WNT7B, PSMC4, ATP6V0A1, HBEGF
GO:0007243~protein kinase cascade	35	3.04688	GRB2, TIRAP, STK17B, LIF, MYD88, DUSP16, TGFA, PIK3CA, STK38L, SIK2, CHUK, CDC42EP5, MAP2K5, FKBPL, PRKCA, MAP2K1, NLK, MAP2K4, MUL1, MINK1, MAPK11, OXSR1, SOCS5, CDK5, BRAP, SRPK1, MARK2, PTPN11, CARD10, SS18, DOK1, PIAS4, RPS6KA1, IKBKB, SLC9A1
GO:0008219~cell death	64	2.9783	HTATIP2, CADM1, ZMAT3, PMAIP1, PAWR, UBQLN1, CIAPIN1, TGFB1, SMNDC1, PDCD2, CASP3, UNC5B, PAK2, SLK, BAG2, MYC, CUL1, SGPL1, LTBR, GAN, IL24, LIG4, STK4, CDK5, SLTM, TAF10, PDCL3, ZDHHC16, KRT18, TNFRSF10B, CDK11B, PDCD6IP, TNFAIP3, PHLPP1, TNFRSF21, LITAF, TNFRSF12A, CLU, MMD, STK17B, BCL2L1, GRAMD4, SERPINB9B, TNFRSF1B, SH3GLB1, KRT8, GATAD2A, FAIM, DYRK2, TRAF4, ERCC2, TRAF3, VAC14, HTT, MUL1,…
GO:0042127~regulation of cell proliferation	62	2.90882	PPARD, FOSL2, PTGS2, TSG101, BTC, PPARG, PMAIP1, PAWR, TGFB1, CASP3, MYD88, ARHGAP5, CHST11, SERPINE1, TGFA, MYC, DLG1, PRKCA, EGFR, GTPBP4, INPPL1, LIG4, CTNNA1, MFN2, TNS3, EREG, HIPK1, HNF4A, ZMIZ1, TGIF1, MED1, CLU, NFKBIA, BCL2L1, IL34, LIF, CD9, KRAS, AGGF1, PLCD3, BCL6, TFF1, RUNX2, ETV4, TES, FKBPL, MAFG, KLF5, NACC1, BECN1, CD276, SMAD3, ICMT, FOXP1, PLA2G4A, CDKN1A, LAMA5, BAX, EEF1E1, …
GO:0010638~positive regulation of organelle organization	13	2.8248	BTC, RICTOR, TGFB1, DSTN, FMN1, UBE2N, EREG, CFL1, RAC1, RHOA, TGFA, TES, DLG1
GO:0001892~embryonic placenta development	13	2.8248	EGFR, LIF, WNT7B, KRT19, HIF1A, MAP2K1, GRB2, KRT8, NCOA6, PLCD3, JUNB, CYR61, MED1
GO:0035023~regulation of Rho protein signal transduction	14	2.70258	ARHGEF1, BCR, ARHGEF18, ARHGEF5, RICTOR, ITSN2, FARP1, PLEKHG3, SOS1, BCL6, PAFAH1B1, FGD6, FGD3, ALS2CL
GO:0030029~actin filament-based process	28	2.64625	MYO5A, BCAR1, MYO9B, FHDC1, KRAS, FAT1, RAC1, RHOA, BCL6, PAFAH1B1, DLG1, INF2, ARHGEF18, PRKCI, ACTN1, TMSB10, RICTOR, MYH9, NCKAP1, FMN1, ATP2C1, ACAP2, CFL1, FLII, WASL, APBB2, ABL2, CDC42BPB
GO:0008544~epidermis development	17	2.56726	MYO5A, EGFR, PPARD, MAP2K1, PTGS2, TSG101, RELA, FST, FOXQ1, CASP3, ATP2C1, LAMA5, SPRR1A, PPL, SPRR2A3, WNT7A, ERCC2
GO:0007167~enzyme linked receptor protein signaling pathway	37	2.53482	LTBP1, LTBP3, GRB2, BCAR1, TIPARP, FST, SRC, TGFB1, MYD88, CTGF, PTK2B, SOS1, TGFA, SKIL, AGRN, SIK2, ADAM9, EGFR, SGPL1, PTPN2, SMAD7, NLK, MYO1E, SMAD3, SOCS5, PTPRN, CDK5, EPHA2, DVL1, PTPN11, SS18, DOK1, EREG, GSK3A, CSRNP1, HBEGF, ACVR1
GO:0031214~biomineral formation	8	2.48737	CNNM4, ENPP1, GLA, PTGS2, TUFT1, FAM83H, MMP13, ERCC2
GO:0051402~neuron apoptosis	7	2.48624	TNFRSF21, CASP3, HTT, BAX, LIG4, CDK5, ATM
GO:0001890~placenta development	15	2.43508	EGFR, PPARD, MAP2K1, GRB2, PPARG, JUNB, LIF, WNT7B, KRT19, HIF1A, KRT8, NCOA6, PLCD3, MED1, CYR61
GO:0043066~negative regulation of apoptosis	33	2.36692	GCLC, BTC, CLU, INTS1, QARS, BCL2L1, GCLM, CIAPIN1, TIMP1, CASP3, KRAS, CHST11, RHOA, PIK3CA, BCL3, BCL6, DNAJC5, FAIM, MYC, ERCC1, RASA1, ANGPTL4, ERCC2, HTT, PIM1, LIG4, CTNNA1, UBE2B, ATM, TAX1BP1, CDKN1A, BAX, APBB2
GO:0006820~anion transport	15	2.35164	SLC22A18, SLC12A2, SLC20A1, HTT, SLCO4A1, ANO1, VDAC2, SLC26A2, SLC4A11, SLC4A7, SLC4A2, SLC4A4, CLCN7, ARL6IP5, TES
GO:0016477~cell migration	29	2.33943	PVR, PPARD, TNFRSF12A, BCAR1, CXCL2, CD2AP, TGFB1, SRC, GAB2, CTGF, RAC1, PAFAH1B1, TES, EGFR, PRKCA, SGPL1, ITGA3, MYH9, CDK5, NCKAP1, TNS3, HIF1A, LAMA5, BAX, CFL1, HBEGF, APBB2, PLAU, ACVR1
GO:0007398~ectoderm development	17	2.33792	MYO5A, EGFR, PPARD, MAP2K1, PTGS2, TSG101, RELA, FST, FOXQ1, CASP3, ATP2C1, LAMA5, SPRR1A, PPL, SPRR2A3, WNT7A, ERCC2
GO:0040007~growth	26	2.33307	MYO5A, PPARD, PTGS2, INTS1, SMAD3, ICMT, BCL2L1, SOCS5, EHMT2, TGFB1, PTPN11, PLAUR, INHBA, RDH10, SBDS, EREG, LY6E, ZMIZ1, CHST11, ANKRD11, HBEGF, AREG, ERCC1, MED1, SLC9A1, ERCC2
GO:0042303~molting cycle	10	2.32837	MYO5A, MPZL3, EGFR, FOXQ1, PPARD, PTGS2, LAMA5, RELA, FST, ERCC2
GO:0042633~hair cycle	10	2.32837	MYO5A, MPZL3, EGFR, FOXQ1, PPARD, PTGS2, LAMA5, RELA, FST, ERCC2
GO:0043632~modification-dependent macromolecule catabolic process	68	2.30535	MAN1B1, RNF181, SENP5, CD2AP, CNOT4, FBXL19, USP19, USP53, RABGEF1, DDA1, RANBP2, FBXO22, USP15, USP14, CUL1, SOCS2, ENC1, HERC4, GAN, UBR1, SOCS5, HLTF, UBE2B, BRAP, UBE2N, SENP3, HUWE1, TRIM33, PIAS4, UBR5, FBXL5, RNF138, MDM2, AMFR, TNFAIP3, NEURL3, PMEPA1, USP7, RAD23B, UBA6, UBE3C, ARIH1, CYLD, ARIH2, STAMBPL1, FBXO6, ZMPSTE24, FBXO4, USP34, USP32, HECTD1, NPLOC4, UBE2CBP, CBL, MUL1, RNF6, P…
GO:0019941~modification-dependent protein catabolic process	68	2.30535	MAN1B1, RNF181, SENP5, CD2AP, CNOT4, FBXL19, USP19, USP53, RABGEF1, DDA1, RANBP2, FBXO22, USP15, USP14, CUL1, SOCS2, ENC1, HERC4, GAN, UBR1, SOCS5, HLTF, UBE2B, BRAP, UBE2N, SENP3, HUWE1, TRIM33, PIAS4, UBR5, FBXL5, RNF138, MDM2, AMFR, TNFAIP3, NEURL3, PMEPA1, USP7, RAD23B, UBA6, UBE3C, ARIH1, CYLD, ARIH2, STAMBPL1, FBXO6, ZMPSTE24, FBXO4, USP34, USP32, HECTD1, NPLOC4, UBE2CBP, CBL, MUL1, RNF6, P…
GO:0048870~cell motility	30	2.29826	PVR, PPARD, TNFRSF12A, BCAR1, CXCL2, CD2AP, TGFB1, SRC, GAB2, CTGF, RAC1, PAFAH1B1, TES, PRKCA, EGFR, SGPL1, MAP2K1, ITGA3, MYH9, CDK5, NCKAP1, TNS3, HIF1A, LAMA5, BAX, CFL1, HBEGF, APBB2, PLAU, ACVR1
GO:0051674~localization of cell	30	2.29826	PVR, PPARD, TNFRSF12A, BCAR1, CXCL2, CD2AP, TGFB1, SRC, GAB2, CTGF, RAC1, PAFAH1B1, TES, PRKCA, EGFR, SGPL1, MAP2K1, ITGA3, MYH9, CDK5, NCKAP1, TNS3, HIF1A, LAMA5, BAX, CFL1, HBEGF, APBB2, PLAU, ACVR1
GO:0043069~negative regulation of programmed cell death	33	2.23802	GCLC, BTC, CLU, INTS1, QARS, BCL2L1, GCLM, CIAPIN1, TIMP1, CASP3, KRAS, CHST11, RHOA, PIK3CA, BCL3, BCL6, DNAJC5, FAIM, MYC, ERCC1, RASA1, ANGPTL4, ERCC2, HTT, PIM1, LIG4, CTNNA1, UBE2B, ATM, TAX1BP1, CDKN1A, BAX, APBB2
GO:0060548~negative regulation of cell death	33	2.23802	GCLC, BTC, CLU, INTS1, QARS, BCL2L1, GCLM, CIAPIN1, TIMP1, CASP3, KRAS, CHST11, RHOA, PIK3CA, BCL3, BCL6, DNAJC5, FAIM, MYC, ERCC1, RASA1, ANGPTL4, ERCC2, HTT, PIM1, LIG4, CTNNA1, UBE2B, ATM, TAX1BP1, CDKN1A, BAX, APBB2
GO:0030163~protein catabolic process	73	2.23278	CAST, MAN1B1, RNF181, SENP5, CD2AP, CNOT4, FBXL19, USP19, USP53, RABGEF1, DDA1, RANBP2, FBXO22, USP15, USP14, CUL1, SOCS2, ENC1, HERC4, GAN, UBR1, SOCS5, MYH9, HLTF, UBE2B, BRAP, UBE2N, SENP3, TRIM33, PIAS4, HUWE1, UBR5, FBXL5, RNF138, MDM2, AMFR, TNFAIP3, NEURL3, PMEPA1, USP7, RAD23B, UBA6, UBE3C, ARIH1, CYLD, ARIH2, STAMBPL1, FBXO6, ZMPSTE24, FBXO4, USP34, USP32, HECTD1, AXIN1, NPLOC4, UBE2CBP,…
GO:0008284~positive regulation of cell proliferation	32	2.18482	PPARD, FOSL2, BTC, CLU, BCL2L1, IL34, TGFB1, LIF, ARHGAP5, KRAS, MYD88, AGGF1, TGFA, BCL6, RUNX2, MYC, DLG1, FKBPL, EGFR, KLF5, NACC1, ICMT, LIG4, FOXP1, TNS3, CDKN1A, EREG, HIPK1, ZMIZ1, TGIF1, HBEGF, MED1
GO:0031331~positive regulation of cellular catabolic process	5	2.17575	GCLC, BECN1, ABHD5, PNPLA2, ADAM9
GO:0048146~positive regulation of fibroblast proliferation	5	2.17575	FOSL2, EREG, ZMIZ1, TGIF1, LIG4
GO:0046578~regulation of Ras protein signal transduction	25	2.12997	GIT1, BCR, ARHGEF1, ARHGEF18, ARHGEF5, ASAP2, ICMT, CYTH2, RICTOR, ITSN2, TBC1D19, FARP1, TBC1D25, PLEKHG3, KRAS, TBC1D12, SOS1, ACAP2, BCL6, PAFAH1B1, FGD6, ARAP2, FGD3, ALS2CL, TBC1D2
GO:0046907~intracellular transport	61	2.10338	GRPEL2, NCBP1, SEC24B, HTATIP2, XPO6, MLPH, CASK, SYNGR1, TGFB1, HOOK2, AP2B1, CHIC2, MCOLN1, STAM, RANBP2, TPR, KIF5B, PRKCI, VPS41, SPIRE1, IPO8, MYH9, ERGIC1, CDK5, M6PR, VTI1A, KIF1C, ANKRD27, MFN2, NPC1, IPO7, ATP2C1, KPNA6, TRAPPC4, MRPL45, STEAP2, VPS26A, MYO5A, SNX9, STX7, NFKBIA, MYO9B, KLC2, RAB7, NUP214, LSG1, PAFAH1B1, TNPO2, VPS36, HSPA9, FAM160A2, HTT, STRADA, ARFIP1, AP2A1, BAX, RS…
GO:0012501~programmed cell death	57	2.04633	HTATIP2, CADM1, ZMAT3, PMAIP1, PAWR, UBQLN1, CIAPIN1, SMNDC1, PDCD2, CASP3, UNC5B, PAK2, SLK, BAG2, MYC, CUL1, SGPL1, LTBR, IL24, LIG4, STK4, CDK5, SLTM, TAF10, PDCL3, ZDHHC16, KRT18, TNFRSF10B, CDK11B, PDCD6IP, TNFAIP3, PHLPP1, TNFRSF21, LITAF, TNFRSF12A, STK17B, BCL2L1, GRAMD4, SH3GLB1, KRT8, GATAD2A, FAIM, DYRK2, TRAF4, ERCC2, TRAF3, HTT, MUL1, SAP30BP, PPP1R13L, ATM, TAX1BP1, TRADD, BAX, CSRN…
GO:0051495~positive regulation of cytoskeleton organization	8	2.03606	FMN1, RAC1, CFL1, RHOA, RICTOR, DSTN, DLG1, TES
GO:0051130~positive regulation of cellular component organization	19	2.03539	TNFRSF12A, BTC, PRKCI, MFGE8, RICTOR, LDLRAP1, TGFB1, DSTN, FMN1, UBE2N, CD47, EREG, RAC1, CFL1, RHOA, TGFA, WNT7A, DLG1, TES
GO:0016044~membrane organization	34	2.01291	MYO7A, SYNJ1, ITSN2, PMAIP1, CD47, CD9, CTTN, SH3GLB1, PACSIN2, RAC1, RABGEF1, PAFAH1B1, ZMPSTE24, AGRN, TRIP10, DLG1, MICALL2, PLD2, NPLOC4, HTT, PRKCI, MFGE8, ITGA3, LDLRAP1, MFN2, NPC1, TFRC, LRP10, AP2A1, LRP12, BAX, RIN1, STEAP2, EPN2
GO:0043388~positive regulation of DNA binding	9	2.00296	UBE2N, MTDH, MYD88, HIPK1, RELA, BRD4, IKBKB, TGFB1, ERCC2

## Sheet: Cluster 2
Supplementary Table 4: Generated GO Terms (biological processes) from gene expression cluster 2, p < 0.001, count ≥ 5
Term	Count	-LOG10(p-value)	Genes
GO:0022613~ribonucleoprotein complex biogenesis	61	23.4601	UTP18, SURF6, GAR1, LSM6, UTP15, EIF2A, DCAF13, EBNA1BP2, WDR36, PRMT7, RRN3, DKC1, LSM2, FTSJ3, PRPF31, KRR1, EMG1, EXOSC7, BYSL, NIP7, EXOSC2, RRP8, RRP9, EXOSC1, SMN1, MRTO4, RCL1, TARBP2, PA2G4, NOP2, ZNHIT6, NHP2, TDRD3, SDAD1, UTP6, NOB1, WBP11, BOP1, FCF1, EIF3D, WDR55, BRIX1, NPM1, WDR12, AATF, RSL24D1, GEMIN6, NMD3, TBL3, TSR1, TSR2, RPL24, FBL, RPF1, DIS3, DDX56, NOP58, NOP56, UTP14A, P…
GO:0042254~ribosome biogenesis	53	22.1988	SURF6, GAR1, UTP18, LSM6, UTP15, EIF2A, DCAF13, EBNA1BP2, WDR36, RRN3, DKC1, FTSJ3, KRR1, EXOSC7, EMG1, BYSL, NIP7, EXOSC2, RRP8, RRP9, EXOSC1, MRTO4, RCL1, PA2G4, NOP2, ZNHIT6, NHP2, SDAD1, UTP6, NOB1, WBP11, BOP1, FCF1, WDR55, NPM1, BRIX1, WDR12, AATF, RSL24D1, NMD3, TBL3, TSR1, TSR2, RPL24, FBL, RPF1, DIS3, DDX56, NOP58, NOP56, UTP14A, PES1, DDX51
GO:0006396~RNA processing	115	21.086	SCAF1, RPP38, CHERP, LSM6, SNRPD3, LSM7, SNRPD2, SART3, PUS7L, EBNA1BP2, U2AF1, RPP30, LSM4, LSM2, LSM1, SNRPA1, KRR1, RPP21, EMG1, MTPAP, RRP8, RRP9, RSL1D1, DDX39, RCL1, PA2G4, NOP2, TRMT11, SNRPA, SNRPF, ZC3H3, TDRD3, PUS3, STRAP, PPIL1, ZCRB1, BOP1, WDR55, HNRNPF, ISY1, PABPC1, TBL3, CSTF3, CSTF2, TSR2, RPF1, TRNT1, DDX56, PPIH, UTP14A, SNRNP27, CSTF1, RPP40, POP7, DDX51, UTP18, GAR1, UTP15, …
GO:0034470~ncRNA processing	59	18.9943	RPP38, GAR1, UTP18, LSM6, UTP15, TRMT1, PUS7L, DCAF13, EBNA1BP2, WDR36, DKC1, TRMT6, CTU2, RPP30, TSEN2, FTSJ3, KRR1, RPP21, EMG1, EXOSC7, EXOSC2, RRP8, RRP9, EXOSC1, RCL1, TARBP2, PA2G4, NOP2, TRMT11, TRUB1, NHP2, TRUB2, PUS3, PUSL1, PUS10, UTP6, TYW3, NOB1, WBP11, BOP1, FCF1, RPP14, WDR55, THG1L, WDR12, NSUN2, TBL3, TSR2, FBL, RPF1, DIS3, TRNT1, DDX56, UTP14A, PES1, DUS4L, RPP40, POP7, DDX51
GO:0034660~ncRNA metabolic process	63	16.103	RPP38, VARS2, UTP18, GAR1, LSM6, UTP15, TRMT1, PUS7L, DCAF13, EBNA1BP2, WDR36, DKC1, TRMT6, CTU2, RPP30, TSEN2, TARSL2, FTSJ3, KRR1, RPP21, EMG1, EXOSC7, EXOSC2, RRP8, RRP9, EXOSC1, RCL1, PA2G4, NOP2, TRMT11, YARS2, TRUB1, NHP2, TRUB2, PUS3, PUSL1, PUS10, UTP6, TYW3, NOB1, WBP11, BOP1, FCF1, RPP14, WDR55, THG1L, LARS, WDR12, NSUN2, TBL3, TSR2, LARS2, FBL, RPF1, DIS3, TRNT1, DDX56, UTP14A, PES1, D…
GO:0006364~rRNA processing	36	15.4656	GAR1, UTP18, LSM6, UTP6, NOB1, UTP15, WBP11, BOP1, FCF1, EBNA1BP2, DCAF13, WDR36, WDR55, DKC1, WDR12, FTSJ3, KRR1, TBL3, TSR2, EXOSC7, EMG1, EXOSC2, RRP8, EXOSC1, RRP9, RPF1, FBL, DIS3, RCL1, PA2G4, DDX56, NOP2, UTP14A, PES1, NHP2, DDX51
GO:0016072~rRNA metabolic process	36	15.1171	GAR1, UTP18, LSM6, UTP6, NOB1, UTP15, WBP11, BOP1, FCF1, EBNA1BP2, DCAF13, WDR36, WDR55, DKC1, WDR12, FTSJ3, KRR1, TBL3, TSR2, EXOSC7, EMG1, EXOSC2, RRP8, EXOSC1, RRP9, RPF1, FBL, DIS3, RCL1, PA2G4, DDX56, NOP2, UTP14A, PES1, NHP2, DDX51
GO:0022403~cell cycle phase	69	9.95039	E2F4, E2F5, E2F6, KNTC1, FAM83D, NDE1, OIP5, SEH1L, PSMC3IP, MTBP, CDCA2, RANBP1, NUP37, H2AFX, TUBG1, CDCA5, FANCA, ASPM, ZW10, CDCA3, CDC6, DSN1, MND1, ESPL1, RB1, NCAPD3, RAD51, DCLRE1A, SPAG5, FANCD2, HAUS7, RUVBL1, NEK4, NUP43, FZR1, HAUS5, NEK2, MRE11A, CAMK2G, KATNB1, CHEK1, CEP55, RCC1, SPC24, BUB1, FBXO5, MNS1, SKA1, CLASP2, ZWILCH, TCF3, TRIP13, ERCC6L, TFDP1, EXO1, KIF18A, CENPF, BRCA2…
GO:0022402~cell cycle process	76	9.07579	GAS2L3, E2F4, E2F5, E2F6, KNTC1, FAM83D, NDE1, SEH1L, OIP5, PSMC3IP, MTBP, CDCA2, RANBP1, NUP37, H2AFX, TUBG1, CDCA5, FANCA, ASPM, ZW10, CDCA3, CDC6, DSN1, MND1, ESPL1, RB1, NCAPD3, RAD51, DCLRE1A, SPAG5, FANCD2, CNTROB, HAUS7, RUVBL1, NEK4, NUP43, FZR1, HAUS5, NEK2, MRE11A, CAMK2G, KATNB1, PML, CHEK1, CEP55, RCC1, SPC24, NPM1, BUB1, FBXO5, MNS1, SKA1, CLASP2, ZWILCH, TCF3, TFDP1, TRIP13, ERCC6L,…
GO:0006259~DNA metabolic process	78	8.8251	KIF22, XRCC4, XRCC3, APLF, XRCC6, POT1A, RNASEH1, MCM10, TERC, CDT1, FANCL, MCM8, CDC45, PRMT7, FANCI, PRIM2, PSMC3IP, H2AFX, FANCA, FANCB, RTEL1, CDC6, POLH, SSBP1, GEN1, USP1, MND1, MBD4, RAD52, ESCO2, PURB, RAD51, RFC5, RAD1, PNKP, RECQL, DCLRE1A, DCLRE1B, EYA2, FANCD2, RRM2, RUVBL2, RUVBL1, DSCC1, ING5, BLM, MRE11A, HUS1, CHEK1, POLA2, BANF1, TK1, PRPF19, CHD1L, RNF168, ATRIP, TCF3, TINF2, TR…
GO:0000279~M phase	59	8.47755	KNTC1, FAM83D, NDE1, OIP5, SEH1L, PSMC3IP, CDCA2, RANBP1, NUP37, H2AFX, TUBG1, CDCA5, FANCA, ASPM, ZW10, CDCA3, CDC6, DSN1, MND1, ESPL1, NCAPD3, RAD51, DCLRE1A, SPAG5, FANCD2, HAUS7, RUVBL1, NEK4, NUP43, FZR1, HAUS5, NEK2, MRE11A, KATNB1, CEP55, RCC1, SPC24, BUB1, FBXO5, MNS1, SKA1, CLASP2, ZWILCH, TRIP13, ERCC6L, EXO1, KIF18A, CENPF, BRCA2, CDC20, RPL24, CDC25C, MIS12, SUV39H2, CDC25B, NEDD1, KI…
GO:0007049~cell cycle	103	7.99125	MRPL41, KNTC1, PKMYT1, ANKRD54, OIP5, CDCA2, NUP37, H2AFX, TUBG1, CDCA5, ASPM, CDCA3, RBL1, MND1, ESPL1, ESCO2, NCAPD3, DCLRE1A, SPAG5, CNTROB, NEK4, NUP43, DSCC1, FZR1, NEK2, MRE11A, KATNB1, CHEK1, RCC1, URGCP, SPC24, NPM1, FBXO5, MNS1, SKA1, CLASP2, TCF3, ERCC6L, TFDP1, CINP, SUV39H1, BRCA2, CDC20, TPD52L1, SUV39H2, NEDD1, CDKN1B, CHAF1A, CHAF1B, GAS2L3, E2F4, E2F5, E2F6, E2F7, E2F8, CDT1, FAM8…
GO:0006412~translation	62	7.80978	RPL18, RPL17, MRPL41, VARS2, RPL15, EIF2A, MRPS30, TRMT6, RPL12, TARSL2, RPL35A, MRPL1, MRPL51, EIF2S3Y, MRPL3, MRPL9, EIF1A, RSL1D1, MRPS18B, MRPS9, RPL41, EIF2S1, MTRF1, RPS12, RPS11, YARS2, EEFSEC, EEF1D, KPNA2, MRPS16, MRPS11, MRPS10, RPL37, MTIF3, MRPL11, EIF3D, MRPL13, RPS28, MRPL12, MRPL15, RPL6, MRPL14, RPL31, RPL34, GFM1, RPL9, MRPL19, LARS, RSL24D1, AIMP1, AIMP2, RPL26, RPL24, LARS2, RP…
GO:0000278~mitotic cell cycle	55	7.22989	E2F4, E2F5, E2F6, KNTC1, FAM83D, NDE1, OIP5, SEH1L, MTBP, CDCA2, NUP37, TUBG1, CDCA5, ASPM, ZW10, CDCA3, CDC6, DSN1, RB1, NCAPD3, DCLRE1A, SPAG5, HAUS7, RUVBL1, NEK4, NUP43, FZR1, HAUS5, NEK2, CAMK2G, KATNB1, CHEK1, CEP55, RCC1, SPC24, BUB1, FBXO5, SKA1, CLASP2, ZWILCH, TCF3, ERCC6L, TFDP1, KIF18A, CENPF, CDC20, RPL24, TPD52L1, CDC25C, MIS12, CDC25B, NEDD1, KIF20B, PES1, TXNL4A
GO:0008033~tRNA processing	24	6.89241	RPP38, PUS3, RPP21, PUSL1, LSM6, PUS10, TYW3, TRMT1, FBL, RPP14, TRNT1, PUS7L, TRMT11, TRMT6, CTU2, THG1L, RPP30, TSEN2, TRUB1, DUS4L, TRUB2, NSUN2, POP7, RPP40
GO:0006281~DNA repair	48	6.66574	KIF22, XRCC4, XRCC3, APLF, BLM, MRE11A, XRCC6, HUS1, CHEK1, PRPF19, FANCL, CHD1L, FANCI, RNF168, H2AFX, FANCA, ATRIP, FANCB, RTEL1, TRIP13, EXO1, SSRP1, SHPRH, RAD51AP1, MSH3, POLH, GEN1, USP1, BRCA2, MBD4, WRN, ATR, RAD52, ESCO2, RAD51, RAD1, PNKP, DCLRE1A, DCLRE1B, EYA2, FANCD2, TDP1, POLD1, RUVBL2, OGG1, CHAF1A, CHAF1B, BARD1
GO:0000087~M phase of mitotic cell cycle	44	5.75256	FZR1, HAUS5, NEK2, KNTC1, KATNB1, CEP55, RCC1, SPC24, FAM83D, NDE1, OIP5, SEH1L, BUB1, CDCA2, FBXO5, NUP37, SKA1, CLASP2, ZWILCH, CDCA5, ASPM, ERCC6L, CDCA3, ZW10, CDC6, DSN1, KIF18A, CENPF, RPL24, CDC20, CDC25C, NCAPD3, MIS12, CDC25B, NEDD1, DCLRE1A, SPAG5, KIF20B, HAUS7, RUVBL1, PES1, NEK4, NUP43, TXNL4A
GO:0006397~mRNA processing	55	5.66327	SCAF1, SNRPD3, LSM6, LSM7, SNRPD2, DGCR14, PRMT7, GPX4, U2AF1, DBR1, LSM4, MAGOHB, LSM2, TSEN2, LSM1, SNRPA1, PRPF31, MTPAP, PRPF4, TTF2, SMN1, DDX39, SNRNP48, SNRPA, RBM38, CPSF4, SNRPF, CPSF3, CPSF1, PRPF38B, ZC3H3, TDRD3, PPP4R2, STRAP, PPIL1, ZCRB1, WBP11, SF3B5, PRPF19, PRPF8, HNRNPF, USP39, ISY1, PABPC1, GEMIN6, GEMIN5, CSTF3, CSTF2, PPIH, LSM11, SNRNP27, CWC22, CSTF1, TXNL4A, RBM17
GO:0008380~RNA splicing	46	5.54977	SCAF1, TDRD3, PPP4R2, STRAP, LSM6, PPIL1, SNRPD3, LSM7, ZCRB1, SNRPD2, WBP11, SF3B5, DGCR14, PRPF19, PRMT7, PRPF8, HNRNPF, USP39, ISY1, U2AF1, DBR1, LSM4, MAGOHB, PABPC1, LSM2, GEMIN6, TSEN2, LSM1, GEMIN5, SNRPA1, PRPF31, PRPF4, TTF2, SMN1, DDX39, SNRNP48, PPIH, SNRPA, LSM11, RBM38, SNRPF, CWC22, SNRNP27, PRPF38B, TXNL4A, RBM17
GO:0006310~DNA recombination	21	5.37623	EXO1, XRCC4, XRCC3, RAD51AP1, BLM, MSH3, HUS1, XRCC6, BRCA2, MND1, WRN, RAD52, BANF1, RAD51, RECQL, PSMC3IP, H2AFX, RUVBL2, RUVBL1, TCF3, TRIP13
GO:0007067~mitosis	42	5.23534	FZR1, HAUS5, NEK2, KNTC1, KATNB1, CEP55, RCC1, SPC24, FAM83D, NDE1, OIP5, SEH1L, BUB1, CDCA2, FBXO5, NUP37, SKA1, CLASP2, ZWILCH, CDCA5, ASPM, ERCC6L, CDCA3, ZW10, CDC6, DSN1, KIF18A, CDC20, CDC25C, NCAPD3, MIS12, CDC25B, NEDD1, DCLRE1A, SPAG5, KIF20B, HAUS7, RUVBL1, PES1, NEK4, NUP43, TXNL4A
GO:0000280~nuclear division	42	5.23534	FZR1, HAUS5, NEK2, KNTC1, KATNB1, CEP55, RCC1, SPC24, FAM83D, NDE1, OIP5, SEH1L, BUB1, CDCA2, FBXO5, NUP37, SKA1, CLASP2, ZWILCH, CDCA5, ASPM, ERCC6L, CDCA3, ZW10, CDC6, DSN1, KIF18A, CDC20, CDC25C, NCAPD3, MIS12, CDC25B, NEDD1, DCLRE1A, SPAG5, KIF20B, HAUS7, RUVBL1, PES1, NEK4, NUP43, TXNL4A
GO:0001522~pseudouridine synthesis	9	5.19874	PUS7L, PUS3, RPUSD4, DKC1, PUSL1, TRUB1, TRUB2, NHP2, PUS7
GO:0006399~tRNA metabolic process	29	5.17782	RPP38, PUS3, VARS2, LSM6, PUSL1, PUS10, TYW3, TRMT1, RPP14, PUS7L, TRMT6, CTU2, LARS, THG1L, RPP30, TSEN2, NSUN2, TARSL2, RPP21, LARS2, FBL, TRNT1, TRMT11, YARS2, DUS4L, TRUB1, TRUB2, POP7, RPP40
GO:0043933~macromolecular complex subunit organization	55	4.91538	HIST4H4, SURF6, TBP, EIF2A, GTF2E1, PRMT7, RRN3, HIST1H2BK, SEH1L, HIST2H2AC, H2AFX, LSM2, TUBG1, NRG1, GM8203, DCTPP1, ZW10, PRPF31, ATPAF2, NIP7, TTF2, SMN1, TARBP2, TBCA, MTRF1, RRM2, IPO5, TUBA4A, CAV2, TDRD3, CAV1, HIST1H2AG, PML, PDSS1, MTIF3, PDSS2, MTMR2, EIF3D, SET, CEP57, CENPA, NPM1, FBXO5, ASF1B, GEMIN6, HIST1H2BB, SHPRH, TSR1, CEBPG, KIF18A, RPL24, MIS12, NEDD1, PSMG1, HIST1H3H
GO:0048285~organelle fission	42	4.82567	FZR1, HAUS5, NEK2, KNTC1, KATNB1, CEP55, RCC1, SPC24, FAM83D, NDE1, OIP5, SEH1L, BUB1, CDCA2, FBXO5, NUP37, SKA1, CLASP2, ZWILCH, CDCA5, ASPM, ERCC6L, CDCA3, ZW10, CDC6, DSN1, KIF18A, CDC20, CDC25C, NCAPD3, MIS12, CDC25B, NEDD1, DCLRE1A, SPAG5, KIF20B, HAUS7, RUVBL1, PES1, NEK4, NUP43, TXNL4A
GO:0016071~mRNA metabolic process	58	4.82183	SCAF1, LSM6, SNRPD3, LSM7, SNRPD2, DGCR14, PARN, PRMT7, GPX4, U2AF1, DBR1, LSM4, MAGOHB, LSM2, TSEN2, LSM1, SNRPA1, PRPF31, MTPAP, PRPF4, TTF2, SMN1, DDX39, SNRNP48, SNRPA, RBM38, CPSF4, SNRPF, CPSF3, PRPF38B, CPSF1, ZC3H3, TDRD3, PPP4R2, STRAP, PPIL1, ZCRB1, WBP11, SF3B5, PRPF19, ZFP36L2, PRPF8, HNRNPF, USP39, ISY1, PABPC1, GEMIN6, GEMIN5, CSTF3, CSTF2, CEBPG, PPIH, LSM11, SNRNP27, CWC22, CSTF1,…
GO:0034621~cellular macromolecular complex subunit organization	41	4.64723	TDRD3, HIST4H4, SURF6, HIST1H2AG, EIF2A, MTIF3, EIF3D, SET, PRMT7, HIST1H2BK, SEH1L, CENPA, HIST2H2AC, FBXO5, H2AFX, TUBG1, LSM2, GEMIN6, ASF1B, NRG1, GM8203, HIST1H2BB, PRPF31, ATPAF2, SHPRH, TSR1, NIP7, CEBPG, KIF18A, RPL24, MIS12, TTF2, SMN1, TARBP2, NEDD1, PSMG1, TBCA, MTRF1, IPO5, TUBA4A, HIST1H3H
GO:0051321~meiotic cell cycle	18	4.48315	EXO1, NEK2, MRE11A, MND1, BRCA2, ESPL1, CDC25B, SUV39H2, RAD51, FANCD2, PSMC3IP, FBXO5, MNS1, H2AFX, TUBG1, CLASP2, FANCA, TRIP13
GO:0006974~response to DNA damage stimulus	51	4.32051	XRCC4, KIF22, XRCC3, APLF, XRCC6, FANCL, FANCI, H2AFX, FANCA, FANCB, RTEL1, POLH, GEN1, USP1, MBD4, RAD52, ESCO2, RAD51, RAD1, PNKP, DCLRE1A, EYA2, DCLRE1B, FANCD2, RUVBL2, BLM, MRE11A, HUS1, PML, CHEK1, PRPF19, CHD1L, RNF168, ATRIP, TRIP13, EXO1, SSRP1, SHPRH, RAD51AP1, MSH3, BRCA2, ATAD5, ATR, WRN, TDP1, POLD1, OGG1, CHAF1A, CHAF1B, IFI204, BARD1
GO:0051301~cell division	51	4.16845	CKS1B, FZR1, HAUS5, NEK2, KATNB1, KNTC1, CEP55, RCC1, FAM83D, SPC24, NDE1, CDC45, CDCA7, SEH1L, OIP5, CDCA2, BUB1, FBXO5, NUP37, AATF, SKA1, CLASP2, ZWILCH, CDCA5, ASPM, ERCC6L, CDCA3, ZW10, CENPO, CDC7, CDC6, DSN1, CINP, BRCA2, CDC20, RB1, CDC25C, RACGAP1, MIS12, NCAPD3, CDC25B, DCLRE1A, NEDD1, SPAG5, CNTROB, KIF20B, HAUS7, RUVBL1, NEK4, NUP43, TXNL4A
GO:0051327~M phase of meiotic cell cycle	17	4.14287	EXO1, NEK2, MRE11A, MND1, BRCA2, ESPL1, CDC25B, SUV39H2, RAD51, FANCD2, PSMC3IP, FBXO5, MNS1, H2AFX, CLASP2, FANCA, TRIP13
GO:0007126~meiosis	17	4.14287	EXO1, NEK2, MRE11A, MND1, BRCA2, ESPL1, CDC25B, SUV39H2, RAD51, FANCD2, PSMC3IP, FBXO5, MNS1, H2AFX, CLASP2, FANCA, TRIP13
GO:0022618~ribonucleoprotein complex assembly	13	4.0745	TDRD3, EIF3D, TARBP2, PRPF31, PRMT7, TSR1, SURF6, NIP7, EIF2A, RPL24, LSM2, GEMIN6, SMN1
GO:0051276~chromosome organization	60	3.83049	HIST4H4, POT1A, HIRA, TERC, CBX5, PRMT7, HIST1H2BK, SMARCD3, SEH1L, GPX4, HIST2H2AC, SMARCD1, H2AFX, GM8203, CDCA5, RTEL1, ZW10, KDM5D, RBL1, MECP2, RB1, MBD3, NCAPD3, SUZ12, EYA2, FANCD2, RUVBL2, RUVBL1, NCAPH2, CARM1, ING5, UTP3, ING3, BLM, NEK2, HIST1H2AG, CHD1L, SET, CENPA, PBRM1, RNF168, ASF1B, TCF3, TINF2, HIST1H2BB, AEBP2, SHPRH, L3MBTL2, CEBPG, KIF18A, SUV39H1, BRCA2, WRN, SIRT1, MIS12, S…
GO:0065003~macromolecular complex assembly	47	3.59892	CAV2, TDRD3, HIST4H4, CAV1, SURF6, HIST1H2AG, PML, TBP, EIF2A, PDSS1, PDSS2, MTMR2, GTF2E1, EIF3D, SET, PRMT7, CEP57, RRN3, HIST1H2BK, CENPA, HIST2H2AC, NPM1, FBXO5, H2AFX, TUBG1, LSM2, GEMIN6, ASF1B, GM8203, DCTPP1, ZW10, HIST1H2BB, PRPF31, ATPAF2, SHPRH, TSR1, NIP7, RPL24, MIS12, SMN1, TARBP2, PSMG1, TBCA, RRM2, IPO5, TUBA4A, HIST1H3H
GO:0006260~DNA replication	30	3.534	ING5, BLM, POT1A, RNASEH1, POLA2, MCM10, TERC, CDT1, TK1, CDC45, MCM8, PRIM2, GINS1, SSRP1, CDC6, SSBP1, POLH, CINP, BRCA2, WRN, PURB, RAD51, POLD3, RFC5, RRM2, POLD1, CHTF18, CHAF1A, CHAF1B, DSCC1
GO:0034622~cellular macromolecular complex assembly	33	3.20926	TDRD3, HIST4H4, SURF6, HIST1H2AG, EIF2A, EIF3D, SET, PRMT7, HIST1H2BK, CENPA, HIST2H2AC, FBXO5, H2AFX, TUBG1, LSM2, ASF1B, GEMIN6, GM8203, HIST1H2BB, PRPF31, ATPAF2, SHPRH, TSR1, NIP7, RPL24, MIS12, SMN1, TARBP2, PSMG1, TBCA, IPO5, TUBA4A, HIST1H3H
GO:0009451~RNA modification	12	2.9642	PUS7L, PUS3, RPUSD4, DKC1, PUSL1, CTU2, THG1L, TRUB1, TRUB2, NHP2, FTSJ3, PUS7
GO:0006626~protein targeting to mitochondrion	9	2.93579	BID, TOMM5, TIMM9, MTX1, TIMM10, TOMM20, TOMM40, TIMM8B, AIP
GO:0070585~protein localization in mitochondrion	9	2.93579	BID, TOMM5, TIMM9, MTX1, TIMM10, TOMM20, TOMM40, TIMM8B, AIP
GO:0033554~cellular response to stress	57	2.66182	KIF22, XRCC4, XRCC3, APLF, XRCC6, FANCL, STAC, FANCI, GPX4, TRPV4, H2AFX, FANCA, FANCB, RTEL1, POLH, GEN1, USP1, MBD4, RAD52, ESCO2, RAD51, RAD1, PNKP, DCLRE1A, EYA2, DCLRE1B, FANCD2, EIF2S1, RUVBL2, BLM, MRE11A, HUS1, PML, CHEK1, PRPF19, CHD1L, RNF168, ATRIP, TRIP13, SREBF1, EXO1, SSRP1, SHPRH, RAD51AP1, MSH3, BRCA2, ATAD5, ATR, WRN, SIRT1, TDP1, POLD1, OGG1, CHAF1A, CHAF1B, IFI204, BARD1
GO:0042255~ribosome assembly	5	2.54327	TSR1, SURF6, NIP7, RPL24, EIF2A
GO:0017038~protein import	17	2.45865	BID, MTX1, PML, TIMM10, TOMM40, POLA2, TIMM8B, AIP, CEP57, TOMM5, IPO5, TIMM9, TOMM20, NOP58, KPNA4, KPNA3, KPNA2
GO:0006325~chromatin organization	44	2.43427	ING5, UTP3, HIST4H4, ING3, HIST1H2AG, HIRA, CBX5, CHD1L, SET, PRMT7, HIST1H2BK, SMARCD3, CENPA, GPX4, HIST2H2AC, SMARCD1, PBRM1, RNF168, H2AFX, ASF1B, TCF3, GM8203, KDM5D, HIST1H2BB, AEBP2, SHPRH, L3MBTL2, CEBPG, RBL1, SUV39H1, MECP2, RB1, MBD3, SIRT1, SUV39H2, SUZ12, MSL3, EYA2, RUVBL2, RUVBL1, CARM1, HIST1H3H, HDAC7, MPHOSPH8
GO:0006333~chromatin assembly or disassembly	18	2.43058	HIST1H2BB, HIST4H4, SHPRH, HIST1H2AG, CEBPG, SUV39H1, CBX5, SUV39H2, MSL3, SET, HIST1H2BK, CENPA, HIST2H2AC, H2AFX, ASF1B, GM8203, MPHOSPH8, HIST1H3H
GO:0007059~chromosome segregation	15	2.38058	CENPO, NEK2, DSN1, KIF18A, CENPF, ESPL1, NCAPD3, MIS12, EBNA1BP2, SEH1L, NUP37, SKA1, NUP43, CDCA5, ZW10
GO:0051329~interphase of mitotic cell cycle	12	2.29773	E2F4, E2F5, E2F6, CAMK2G, MTBP, CENPF, TPD52L1, CHEK1, RB1, CDCA5, TCF3, TFDP1
GO:0034728~nucleosome organization	13	2.2311	HIST1H2BB, HIST4H4, SHPRH, HIST1H2AG, CEBPG, SET, HIST1H2BK, CENPA, HIST2H2AC, H2AFX, ASF1B, GM8203, HIST1H3H
GO:0033365~protein localization in organelle	18	2.22914	BID, MTX1, PML, TIMM10, TOMM40, POLA2, TIMM8B, WDR92, AIP, CEP57, TOMM5, IPO5, TIMM9, TOMM20, NOP58, KPNA4, KPNA3, KPNA2
GO:0006913~nucleocytoplasmic transport	18	2.16566	NXT1, ZC3H3, XPO5, PML, POLA2, CCHCR1, ANKRD54, CEP57, IPO5, NPM1, NUP50, NOP58, GLE1, KPNA4, KPNA3, MYBBP1A, KPNA2, NMD3
GO:0065004~protein-DNA complex assembly	13	2.14698	HIST1H2BB, HIST4H4, SHPRH, SET, HIST1H2BK, HIST1H2AG, CENPA, HIST2H2AC, H2AFX, ASF1B, GM8203, HIST1H3H, MIS12
GO:0051325~interphase	12	2.1147	E2F4, E2F5, E2F6, CAMK2G, MTBP, CENPF, TPD52L1, CHEK1, RB1, CDCA5, TCF3, TFDP1
GO:0051169~nuclear transport	18	2.10392	NXT1, ZC3H3, XPO5, PML, POLA2, CCHCR1, ANKRD54, CEP57, IPO5, NPM1, NUP50, NOP58, GLE1, KPNA4, KPNA3, MYBBP1A, KPNA2, NMD3
GO:0006323~DNA packaging	16	2.06143	HIST1H2BB, HIST4H4, SHPRH, HIST1H2AG, SUV39H1, NCAPD3, SET, HIST1H2BK, CENPA, HIST2H2AC, H2AFX, NCAPH2, ASF1B, CDCA5, GM8203, HIST1H3H

## Sheet: Cluster 3
Supplementary Table 4: Generated GO Terms (biological processes) from gene expression cluster 3, p < 0.001, count ≥ 5
Term	Count	-LOG10(p-value)	Genes
GO:0010876~lipid localization	15	4.05016	SLC27A1, HDLBP, SPNS2, HNF1A, HEXA, OSBPL7, SORL1, ABCG1, ATP9A, ATP8B1, VPS4B, OSBPL10, SCP2, B4GALNT1, VLDLR
GO:0007033~vacuole organization	9	3.87468	HOOK1, MAN2A1, MAP1LC3A, AKTIP, RB1CC1, HEXA, CLN5, GBA, IDUA
GO:0007586~digestion	6	3.59641	COPA, CLPS, PNLIPRP2, CYP39A1, PRSS2, CTRB1
GO:0006665~sphingolipid metabolic process	10	3.34514	CEL, ST6GALNAC4, SMPDL3A, HEXA, SMPD1, KIT, GAL3ST1, ASAH2, GBA, B4GALNT1
GO:0006869~lipid transport	13	3.22977	SLC27A1, HDLBP, SPNS2, HNF1A, OSBPL7, SORL1, ABCG1, ATP9A, VPS4B, ATP8B1, OSBPL10, SCP2, VLDLR
GO:0006643~membrane lipid metabolic process	10	3.19507	CEL, ST6GALNAC4, SMPDL3A, HEXA, SMPD1, KIT, GAL3ST1, ASAH2, GBA, B4GALNT1
GO:0006812~cation transport	22	2.99023	SLC36A1, SLC39A14, SLC38A3, SLC38A9, CACHD1, ATP6V1H, TCN2, KCNK1, ATP6V1D, ITPR2, ANXA6, P2RX4, BSPRY, KCNK6, SLC41A2, SLC39A8, VPS4B, PPP3CA, ATP6V0D1, KCTD14, SLC31A1, SLC30A7
GO:0046942~carboxylic acid transport	10	2.85721	SLC27A1, SLC36A1, SLC38A3, SLC6A9, SLC17A5, HNF1A, SLC38A9, SLC7A2, CTNS, SLC7A4
GO:0015849~organic acid transport	10	2.85721	SLC27A1, SLC36A1, SLC38A3, SLC6A9, SLC17A5, HNF1A, SLC38A9, SLC7A2, CTNS, SLC7A4
GO:0007040~lysosome organization	6	2.67873	HOOK1, AKTIP, HEXA, CLN5, GBA, IDUA
GO:0016192~vesicle-mediated transport	31	2.6127	ARFGAP1, COPA, AP1M2, SEC31A, HIP1R, SORL1, LRBA, LLGL2, AP1S3, HOOK1, COPB2, BLZF1, GSN, VPS4B, AP3D1, GOLGA5, KDELR3, RAB2A, SCAMP1, ARC, ELMO3, AKTIP, VAMP8, ULK1, SYCN, FKBP15, SORT1, CUX1, MERTK, UNC13B, VLDLR
GO:0006811~ion transport	26	2.60548	SLC39A14, SLC36A1, FXYD3, SLC38A3, CACHD1, SLC38A9, FXYD6, ANXA6, KCNK6, SLC39A8, VPS4B, PPP3CA, ATP6V0D1, SLC31A1, SLC30A7, CNNM2, PTGER3, ATP6V1H, KCNK1, TCN2, ATP6V1D, ITPR2, P2RX4, BSPRY, SLC41A2, KCTD14
GO:0002526~acute inflammatory response	8	2.50651	REG3B, REG3A, PTGER3, NUPR1, C3, SLC7A2, SERPING1, REG3G
GO:0016042~lipid catabolic process	11	2.35888	PLD3, CEL, CLPS, PNLIPRP1, PNLIPRP2, CYP39A1, SMPDL3A, FAAH, HEXA, SMPD1, PHYH
GO:0006687~glycosphingolipid metabolic process	5	2.27124	ST6GALNAC4, HEXA, KIT, GAL3ST1, B4GALNT1
GO:0050727~regulation of inflammatory response	7	2.26454	ZFP36, C3, SLC7A2, NDFIP1, FABP4, SERPING1, ADORA1
GO:0030001~metal ion transport	17	2.21299	SLC39A14, SLC38A3, SLC38A9, CACHD1, TCN2, KCNK1, ITPR2, ANXA6, P2RX4, BSPRY, KCNK6, SLC39A8, VPS4B, PPP3CA, SLC31A1, KCTD14, SLC30A7
GO:0048878~chemical homeostasis	19	2.05542	SGK1, HNF1A, PTGER3, EPAS1, FOXA3, HEXA, CLSTN1, BNIP3, ADORA1, P2RX4, NUCB2, MT2, MT1, FABP4, PPP3CA, NR5A2, CLN5, GAL3ST1, IDUA

## Sheet: Cluster 4
Supplementary Table 4: Generated GO Terms (biological processes) from gene expression cluster 4, p < 0.001, count ≥ 5
Term	Count	-LOG10(p-value)	Genes
GO:0007049~cell cycle	162	13.8843	S100A6, PRC1, DBF4, RBM7, AURKA, AURKB, CDCA8, SIN3A, RAD21, CASP8AP2, CDKN2C, CDKN2D, INCENP, ZFP830, TLK2, CCNA2, STAG2, STAG1, CCAR1, ANAPC1, ANAPC2, ZC3HC1, RAN, CHTF8, LIG1, ANAPC4, SKP2, TOPBP1, TACC3, PPP1CC, NCAPD2, PPP1CA, UHRF1, MAD2L1, UHRF2, ZWINT, SIAH1A, MAPK3, PRDM5, NEK9, BIN3, ANAPC7, STMN1, AKAP8, DST, XRN1, NEK6, NEK1, TIPIN, LRRCC1, ANAPC10, ANLN, CHEK2, CCNG2, ITGB1, SESN3, S…
GO:0000279~M phase	90	13.5205	SPIN1, RBM7, AURKB, MLH3, CDCA8, RAD21, INCENP, TUBB5, ZFP830, CCNA2, STAG2, STAG1, ANAPC1, CDK1, ANAPC2, CCNK, ARHGEF2, KIF11, ZC3HC1, RAN, ANAPC4, TPX2, NUSAP1, UBE2I, TOPBP1, TACC3, UBE2C, CDK2, RAD50, NCAPD2, KLHDC3, PPP1CA, CHMP1A, MAD2L1, ZWINT, SIAH1A, NEK9, BUB1B, AKAP8, STMN1, HAUS8, MAPRE1, ANAPC7, XRN1, NEK6, HAUS4, CEP120, NEK1, HAUS2, HAUS1, CETN3, LRRCC1, TIPIN, ANLN, ANAPC10, CCNG2…
GO:0022403~cell cycle phase	100	13.3838	DBF4, RBM7, AURKB, CDCA8, RAD21, SIN3A, INCENP, ZFP830, CCNA2, STAG2, STAG1, ANAPC1, ANAPC2, ZC3HC1, RAN, ANAPC4, SKP2, TOPBP1, TACC3, NCAPD2, PPP1CA, MAD2L1, ZWINT, SIAH1A, NEK9, AKAP8, STMN1, ANAPC7, XRN1, NEK6, NEK1, LRRCC1, TIPIN, ANLN, ANAPC10, ITGB1, CCNG2, SPC25, NIPBL, NCAPG2, KATNA1, CLASP1, HELLS, MKI67, CKAP5, PCNT, NUF2, SYCE2, CDC23, NDC80, PMF1, CDC27, PLK1, SMC1A, SPIN1, MLH3, TUBB…
GO:0006259~DNA metabolic process	113	11.4094	HMGN1, MORF4L1, MMS19, XRCC5, PDGFB, DBF4, XRCC1, SETX, DNASE1L1, NONO, PRIM1, TOP1, EPC2, RAD21, SIN3A, RBMS1, POLI, NUDT1, DTL, CHTF8, LIG1, POLE, TOPBP1, RMI1, EEPD1, TNKS2, UHRF1, RFC3, RFC4, RFC1, RFC2, FBXO18, RAD18, XRN1, XRN2, TNFAIP1, TIPIN, TTC5, XAB2, RBX1, TRP53BP1, POLE2, NTHL1, HELLS, TRP53, GINS2, GINS3, GINS4, PPFIBP1, BRIP1, SMG1, RAD54L, BRCA1, PCNA, DNMT1, SMC1A, PARP2, CLSPN, …
GO:0022402~cell cycle process	108	11.0052	DBF4, RBM7, AURKB, CDCA8, RAD21, SIN3A, INCENP, ZFP830, CCNA2, STAG2, STAG1, ANAPC1, ANAPC2, ZC3HC1, RAN, ANAPC4, SKP2, TOPBP1, TACC3, NCAPD2, PPP1CA, MAD2L1, ZWINT, SIAH1A, NEK9, STMN1, AKAP8, ANAPC7, XRN1, DST, NEK6, NEK1, LRRCC1, TIPIN, ANLN, ANAPC10, ITGB1, CCNG2, SESN3, SPC25, NIPBL, NCAPG2, KATNA1, CLASP1, HELLS, MKI67, CKAP5, PCNT, NUF2, SYCE2, CDC23, NDC80, PMF1, CDC27, BRCA1, NOTCH2, PLK…
GO:0000278~mitotic cell cycle	82	10.5629	DBF4, AURKA, AURKB, CDCA8, RAD21, SIN3A, INCENP, ZFP830, CCNA2, STAG2, STAG1, ANAPC1, CDK1, ANAPC2, ARHGEF2, CCNK, KIF11, ZC3HC1, ANP32B, RAN, ANAPC4, SKP2, NUSAP1, UBE2I, UBE2C, CDK2, NCAPD2, PPM1D, CCND1, CHMP1A, MAD2L1, ZWINT, PRDM5, NEK9, BUB1B, AKAP8, STMN1, HAUS8, MAPRE1, ANAPC7, GADD45A, NEK6, HAUS4, NEK1, HAUS2, HAUS1, CETN3, LRRCC1, TIPIN, POLA1, ANLN, ANAPC10, ITGB1, CCNG2, SPC25, NCAPH…
GO:0051301~cell division	88	10.0684	CDK19, CDC14A, PRC1, AURKB, DAXX, CCNE2, CCNE1, TOP1, CDC42, CDCA8, RAD21, INCENP, ZFP830, TOP2A, CCNA2, STAG2, STAG1, ANAPC1, CDK1, ANAPC2, CCNK, ARHGEF2, KIF11, ZC3HC1, STX2, ROCK1, RAN, ROCK2, LIG1, ANAPC4, NUSAP1, UBE2I, CDK7, CDK4, PPP1CC, UBE2C, CDK2, MCM5, NCAPD2, PPP1CA, CCND1, CHMP1A, MAD2L1, ZWINT, NEK9, BUB1B, BIN3, HAUS8, MAPRE1, ANAPC7, NEK6, HAUS4, NEK1, HAUS2, HAUS1, CETN3, LRRCC1,…
GO:0007067~mitosis	68	9.99201	AURKB, CDCA8, RAD21, INCENP, ZFP830, CCNA2, STAG2, STAG1, ANAPC1, CDK1, ANAPC2, ARHGEF2, CCNK, KIF11, ZC3HC1, RAN, ANAPC4, NUSAP1, UBE2I, UBE2C, CDK2, NCAPD2, CHMP1A, MAD2L1, ZWINT, NEK9, BUB1B, AKAP8, HAUS8, MAPRE1, ANAPC7, NEK6, HAUS4, NEK1, HAUS2, HAUS1, CETN3, LRRCC1, TIPIN, ANLN, ANAPC10, CCNG2, SPC25, NCAPH, NIPBL, NCAPG2, KATNA1, CLASP1, BUB3, HELLS, TERF1, PDS5B, CKAP5, NUF2, CDC23, CENPE…
GO:0000280~nuclear division	68	9.99201	AURKB, CDCA8, RAD21, INCENP, ZFP830, CCNA2, STAG2, STAG1, ANAPC1, CDK1, ANAPC2, ARHGEF2, CCNK, KIF11, ZC3HC1, RAN, ANAPC4, NUSAP1, UBE2I, UBE2C, CDK2, NCAPD2, CHMP1A, MAD2L1, ZWINT, NEK9, BUB1B, AKAP8, HAUS8, MAPRE1, ANAPC7, NEK6, HAUS4, NEK1, HAUS2, HAUS1, CETN3, LRRCC1, TIPIN, ANLN, ANAPC10, CCNG2, SPC25, NCAPH, NIPBL, NCAPG2, KATNA1, CLASP1, BUB3, HELLS, TERF1, PDS5B, CKAP5, NUF2, CDC23, CENPE…
GO:0000087~M phase of mitotic cell cycle	69	9.91954	AURKB, CDCA8, RAD21, INCENP, ZFP830, CCNA2, STAG2, STAG1, ANAPC1, CDK1, ANAPC2, ARHGEF2, CCNK, KIF11, ZC3HC1, RAN, ANAPC4, NUSAP1, UBE2I, UBE2C, CDK2, NCAPD2, CHMP1A, MAD2L1, ZWINT, NEK9, BUB1B, AKAP8, HAUS8, MAPRE1, ANAPC7, NEK6, HAUS4, NEK1, HAUS2, HAUS1, CETN3, LRRCC1, TIPIN, ANLN, ANAPC10, CCNG2, SPC25, NCAPH, NIPBL, NCAPG2, KATNA1, CLASP1, BUB3, HELLS, TERF1, PDS5B, CKAP5, DLGAP5, NUF2, CDC2…
GO:0016071~mRNA metabolic process	95	9.6565	PRPF4B, CRNKL1, RBM15B, U2AF2, SNRPD1, RBM5, SKIV2L2, WBP4, PNN, RNGTT, DCPS, NONO, PLRG1, TARDBP, PRMT5, SRRM1, LSM3, PTBP2, LUC7L3, TSEN15, PABPN1, PHRF1, EFTUD2, MAGOH, HNRNPA2B1, PTBP1, PRPF39, PRPF3, CDC5L, QK, PRPF6, AQR, PAPD4, CPSF7, SNRPB, THOC7, CPSF6, SLU7, SNRNP40, RBM39, CPSF2, THOC3, SNRPE, XRN2, THOC1, SNRPG, FIP1L1, TRA2B, SNRPB2, PNPT1, KIN, XAB2, SF3B3, SF3B2, HNRNPL, HNRNPA3, H…
GO:0048285~organelle fission	68	9.19002	AURKB, CDCA8, RAD21, INCENP, ZFP830, CCNA2, STAG2, STAG1, ANAPC1, CDK1, ANAPC2, ARHGEF2, CCNK, KIF11, ZC3HC1, RAN, ANAPC4, NUSAP1, UBE2I, UBE2C, CDK2, NCAPD2, CHMP1A, MAD2L1, ZWINT, NEK9, BUB1B, AKAP8, HAUS8, MAPRE1, ANAPC7, NEK6, HAUS4, NEK1, HAUS2, HAUS1, CETN3, LRRCC1, TIPIN, ANLN, ANAPC10, CCNG2, SPC25, NCAPH, NIPBL, NCAPG2, KATNA1, CLASP1, BUB3, HELLS, TERF1, PDS5B, CKAP5, NUF2, CDC23, CENPE…
GO:0006397~mRNA processing	83	8.40004	PRPF4B, CRNKL1, RBM15B, U2AF2, SNRPD1, RBM5, SKIV2L2, WBP4, RNGTT, PNN, NONO, PLRG1, TARDBP, PRMT5, SRRM1, LSM3, PTBP2, LUC7L3, TSEN15, PABPN1, PHRF1, EFTUD2, MAGOH, HNRNPA2B1, PTBP1, PRPF39, PRPF3, CDC5L, QK, PRPF6, AQR, PAPD4, CPSF7, SNRPB, THOC7, CPSF6, SLU7, SNRNP40, RBM39, CPSF2, THOC3, SNRPE, XRN2, THOC1, SNRPG, FIP1L1, TRA2B, SNRPB2, KIN, XAB2, SF3B3, SF3B2, HNRNPL, HNRNPA3, HNRNPM, SF3B1,…
GO:0051276~chromosome organization	99	7.94294	HMGN1, MORF4L1, CBX3, INO80, CBX1, KDM1A, EPC2, H2AFV, HIST1H2BL, H2AFY, TLK2, ACIN1, MTA2, H2AFJ, NCAPD2, TNKS2, MAD2L1, EP300, SMARCE1, BAZ1B, PRDM5, SMARCA5, AKAP8, XRN1, SMARCA4, TRRAP, VPS72, NIPBL, SMARCB1, NCAPG2, HELLS, SETDB1, TRP53, TAF1, YEATS4, SETDB2, EHMT1, SMCHD1, SYCE2, KAT5, RAD54L, HDAC3, HDAC2, HDAC1, SMARCC1, RNF2, DNMT1, SMC1A, HDAC6, ARID4B, EZH2, NAP1L1, CTCF, MLH3, POT1B, …
GO:0045449~regulation of transcription	307	6.85288	SNIP1, NAA15, MED24, MED23, REST, MED21, ZFP84, MED20, ZFP87, NONO, EPC2, SIN3B, TAF5L, SIN3A, ZFP90, YEATS2, PHTF1, PATZ1, CCNA2, TBPL1, CCAR1, IKBKAP, ZFP326, MED12, MED11, TAF6L, MED10, HES1, ZFP827, UHRF1, ZFP81, BAZ1B, RFC1, ZFP462, MED17, ZFP280D, MAPK3, PRDM5, MNT, ZZZ3, ZFP821, CDCA7L, VGLL4, IRAK1BP1, CRTC3, FUS, TADA1, ZFP617, VPS72, ZFP451, TRP53BP1, LEO1, HNRNPAB, YEATS4, KLF10, MAML2…
GO:0006260~DNA replication	49	6.85255	PDGFB, DBF4, CCNE2, PRIM1, TOP1, CCNE1, MCM7, SIN3A, RBMS1, RBBP4, POLI, CCDC88A, DTL, LIG1, CHTF8, POLE, MCM2, TOP1MT, MCM3, RBBP7, RMI1, MCM4, MCM5, MCM6, RFC3, RFC4, RFC1, RFC2, RRM1, TOP3A, TNFAIP1, TOP3B, ING4, LIN9, POLA1, TIPIN, KIN, RPA3, RPA1, RPA2, POLE2, TERF1, GINS2, NASP, GINS3, GINS4, BRCA1, PCNA, NFIB
GO:0006974~response to DNA damage stimulus	78	6.59912	HMGN1, MORF4L1, XRCC5, MMS19, CLSPN, POT1B, MLH3, XRCC1, SETX, NONO, EPC2, RAD21, NSMCE1, NSMCE2, PARG, TLK2, CIB1, PGAP2, CDK1, UBE2A, POLI, NUDT1, DTL, DDB1, LIG1, POLE, GTF2H4, ZSWIM7, TOPBP1, TOPORS, GTF2H5, GTF2H2, RAD50, EEPD1, GTF2H1, UHRF1, CCND1, BAZ1B, RIF1, FBXO18, MAPK3, RAD18, GADD45A, XRN2, ING4, NEK1, POLA1, TIPIN, PRKDC, CHEK2, TTC5, KIN, XAB2, MIF, RBX1, RPA1, TRP53BP1, MDC1, PHL…
GO:0007010~cytoskeleton organization	72	6.29619	TLN1, PDGFB, CAPZA2, CAPZA1, WASF2, HOOK3, ACTG1, TUBB5, SHC1, CAP1, PPP4C, RHOG, PLS3, FMNL2, DBNL, ARHGEF2, FMNL3, KIF11, ACTN4, ROCK1, ROCK2, TRPM7, TBCE, TPX2, ARHGEF17, NUSAP1, TACC3, FLNA, VASP, NDEL1, TMSB4X, STMN1, HAUS8, GADD45A, DST, SGCB, HAUS4, PALM, CEP120, CNN3, AGFG1, HAUS2, HAUS1, FHL3, ARPC4, DAAM1, ITGB1, CAPZB, SPC25, PTK2, PRR5, EZR, KATNA1, CNN2, EHD2, CKAP5, CEP192, PCNT, NF…
GO:0008380~RNA splicing	64	6.2134	PRPF4B, CRNKL1, RBM15B, U2AF2, SNRPD1, RBM5, SKIV2L2, WBP4, PNN, NONO, PLRG1, PRMT5, TARDBP, SRRM1, LSM3, PTBP2, LUC7L3, EFTUD2, MAGOH, PTBP1, HNRNPA2B1, PRPF39, PRPF3, CDC5L, QK, PRPF6, AQR, SNRPB, SLU7, THOC7, SNRNP40, RBM39, THOC3, SNRPE, THOC1, SNRPG, TRA2B, SNRPB2, XAB2, SF3B3, HNRNPA3, SF3B1, HNRNPM, HNRNPK, FRG1, CDC40, PPIL3, SCNM1, HNRNPC, SNRNP70, PRPF40B, PPWD1, RBM22, RNPS1, SNW1, CAS…
GO:0006350~transcription	260	5.69689	NAA15, MED24, MED23, REST, MED21, ZFP84, MED20, ZFP87, NONO, PRIM1, EPC2, SIN3B, TAF5L, SIN3A, ZFP90, PHTF1, TBPL1, CCAR1, IKBKAP, ZFP326, MED12, MED11, TAF6L, MED10, HES1, ZFP827, UHRF1, ZFP81, RFC1, BAZ1B, MED17, ZFP280D, PRDM5, MNT, ZZZ3, CDCA7L, ZFP821, VGLL4, IRAK1BP1, CRTC3, MYEF2, TADA1, XAB2, ZFP617, VPS72, ZFP451, TRP53BP1, LEO1, HNRNPAB, YEATS4, KLF10, SMAD4, SMAD2, PMF1, SMAD1, ZFP445,…
GO:0000226~microtubule cytoskeleton organization	33	4.99298	HAUS4, CEP120, HAUS2, CAPZA2, HAUS1, HOOK3, SPC25, PTK2, KATNA1, TUBB5, PPP4C, KIF11, CEP192, CKAP5, PCNT, NUF2, TPX2, TBCE, NUSAP1, BIRC5, NDC80, CENPE, TACC3, TUBGCP2, CENPJ, BRCA1, SMC3, NDEL1, HAUS8, STMN1, DST, GADD45A, RANBP10
GO:0007017~microtubule-based process	48	4.86202	HAUS4, KIF23, SPG7, CEP120, TUBB2B, TUBB2A, HAUS2, CAPZA2, HAUS1, HOOK3, KIF13A, SPC25, PTK2, KLC1, KIFAP3, KATNA1, TUBB5, TUBB6, TUBA1A, PPP4C, KIF2A, KIF3B, KIF11, CKAP5, CEP192, PCNT, NUF2, TBCE, TPX2, NUSAP1, KIF18B, KTN1, NDC80, CENPE, BIRC5, TACC3, TUBGCP2, CENPJ, BRCA1, SMC3, NDEL1, STMN1, HAUS8, GADD45A, DST, XRN2, RANBP10, ACTR10
GO:0006323~DNA packaging	28	4.8346	HIST1H2AB, HIST1H2AC, HIST1H2AF, NAP1L1, NAP1L4, HIST2H2AB, NCAPH, H2AFV, HIST1H2BL, NCAPG2, H2AFY, ACIN1, TOP2A, HELLS, AIFM2, AIFM1, HIST1H2BF, HIST1H2BG, MTA2, NUSAP1, MCM2, H2AFJ, SMC2, NCAPD2, SMC4, CHMP1A, HIST2H2BB, SMARCC1, HIST1H2AK, AKAP8, HIST1H2AN, SMARCA4
GO:0030261~chromosome condensation	12	4.64773	NCAPH, CHMP1A, AIFM2, AIFM1, NCAPG2, NUSAP1, AKAP8, ACIN1, SMC2, TOP2A, NCAPD2, SMC4
GO:0006281~DNA repair	58	4.51807	HMGN1, XRCC5, MMS19, MORF4L1, CLSPN, MLH3, XRCC1, SETX, NONO, EPC2, RAD21, NSMCE1, NSMCE2, UBE2A, POLI, NUDT1, DDB1, LIG1, POLE, GTF2H4, ZSWIM7, TOPBP1, GTF2H5, RAD50, EEPD1, GTF2H2, GTF2H1, UHRF1, FBXO18, RAD18, XRN2, POLA1, PRKDC, TTC5, KIN, XAB2, RBX1, RPA1, TRP53BP1, MDC1, NTHL1, APEX1, TRP53, MSH6, MSH2, SMC5, SMC6, BRIP1, SMG1, RAD54L, BRCA1, SMC3, ATRX, CUL4A, SFPQ, PCNA, SMC1A, PARP2
GO:0007059~chromosome segregation	24	4.30804	PDS5B, NUF2, NUSAP1, UBE2I, CTCF, BIRC5, CENPE, NDC80, PMF1, CENPH, SMC4, SPC25, CHMP1A, RAD21, NIPBL, MAD2L1, INCENP, AKAP8, TOP2A, NEK6, BUB3, STAG2, TOP3B, STAG1
GO:0006396~RNA processing	104	4.29503	PRPF4B, RBM15B, U2AF2, SNRPD1, RBM5, INTS2, PNN, NONO, INTS7, TARDBP, INTS6, SRRM1, LSM3, PTBP2, TGS1, LUC7L3, PABPN1, PHRF1, RRP1, EFTUD2, MAGOH, HNRNPA2B1, PTBP1, AQR, SNRPB, SLU7, XRN1, SNRPE, XRN2, SNRPG, FIP1L1, PNPT1, SNRPB2, XAB2, HNRNPL, HNRNPA3, HNRNPM, MOV10, HNRNPK, FRG1, PRKRA, CDC40, PPIL3, HNRNPC, PRPF40B, SSB, INTS12, RNPS1, SNW1, CASC3, DDX5, PPIE, URM1, POP4, HNRNPH1, SNRNP25, CR…
GO:0006270~DNA replication initiation	9	4.22923	CCNE2, CCNE1, MCM7, POLA1, MCM2, MCM3, MCM4, MCM5, MCM6
GO:0006325~chromatin organization	69	3.96117	HMGN1, MORF4L1, ARID4B, EZH2, NAP1L1, CBX3, INO80, CTCF, CBX1, NAP1L4, HIST2H2AB, KDM1A, EPC2, PCGF2, H2AFV, HIST1H2BL, PRMT5, RTF1, H2AFY, TLK2, KDM5A, TBL1XR1, RBBP4, MTA2, H2AFJ, MCM2, RBBP7, HIST2H2BB, EP300, SMARCE1, BAZ1B, PRDM5, SMARCA5, USP21, JMJD1C, USP22, MAP3K12, SMARCA4, HIST1H2AB, ING4, HIST1H2AC, HIST1H2AF, HAT1, TRRAP, VPS72, SMARCB1, KDM3A, ACTL6A, KDM3B, MYSM1, HELLS, CHD3, SETD…
GO:0033554~cellular response to stress	87	3.78189	HMGN1, MORF4L1, XRCC5, MMS19, CLSPN, PXDN, PRDX2, MLH3, POT1B, XRCC1, SETX, NONO, EPC2, RAD21, NSMCE1, NSMCE2, PARG, TLK2, CIB1, PGAP2, CDK1, UBE2A, POLI, NUDT1, DTL, DDB1, LIG1, POLE, GTF2H4, ZSWIM7, TOPBP1, TOPORS, GTF2H5, GTF2H2, EEPD1, RAD50, GTF2H1, UHRF1, CCND1, BAZ1B, RIF1, FBXO18, MAPK3, RAD18, MAPK8, EIF2AK2, GADD45A, EIF2AK4, XRN2, ING4, NEK1, POLA1, TIPIN, PRKDC, CHEK2, TTC5, KIN, XAB2…
GO:0006695~cholesterol biosynthetic process	13	3.61638	TM7SF2, CYP51, CYB5R3, HMGCR, FDPS, HMGCS1, MVK, PRKAA1, PMVK, HSD17B7, NSDHL, DHCR24, FDFT1
GO:0007051~spindle organization	14	3.602	HAUS4, SPC25, CEP120, PCNT, HAUS2, HAUS1, TPX2, TUBB5, NDC80, HAUS8, STMN1, TACC3, CENPJ, SMC3
GO:0006261~DNA-dependent DNA replication	16	3.43556	POLA1, TIPIN, MCM2, TOP1MT, MCM3, MCM4, MCM5, MCM6, CCNE2, PRIM1, TOP1, CCNE1, MCM7, POLE2, TOP3A, TOP3B
GO:0015931~nucleobase, nucleoside, nucleotide and nucleic acid transport	23	3.02685	NUP133, XPO1, SLC25A4, NUP160, CKAP5, MAGOH, HNRNPA2B1, FMR1, NUP93, NUP188, CASC3, NXF1, NUP155, QK, SLC29A1, DDX19A, THOC7, NUP107, NUP54, EIF5A2, THOC3, LRPPRC, THOC1
GO:0009057~macromolecule catabolic process	123	2.94974	DZIP3, PGLYRP1, RNF216, SAE1, DNASE1L1, DCPS, CUL2, G2E3, CUL5, BTBD1, WWP2, FBXO25, RBCK1, ERAP1, FBXO21, RNF34, ANAPC1, ANAPC2, ZC3HC1, DTL, MAGOH, ANAPC4, SKP2, PSMA2, PSMA1, UHRF1, UHRF2, UBR7, FBXO18, SIAH1A, PSMA4, PSMA3, RAD18, ASB3, ANAPC7, XRN2, ASB7, FBXO11, PNPT1, ANAPC10, NEDD8, SKP1A, PSMA7, RBX1, PSMB4, EIF3E, PSMB2, FBXW2, TRAF7, UBE2D1, NTHL1, SMG5, SMG7, SMG1, CDC23, RNPS1, CASC3…
GO:0016568~chromatin modification	54	2.85597	MORF4L1, EZH2, CBX3, INO80, CTCF, KDM1A, PCGF2, EPC2, PRMT5, RTF1, H2AFY, TLK2, KDM5A, TBL1XR1, RBBP4, MTA2, RBBP7, EP300, SMARCE1, BAZ1B, PRDM5, SMARCA5, USP21, USP22, JMJD1C, MAP3K12, SMARCA4, ING4, HAT1, TRRAP, VPS72, SMARCB1, KDM3A, ACTL6A, KDM3B, HELLS, MYSM1, SETDB1, TAF1, YEATS4, EHMT1, SETDB2, NASP, KAT5, ATXN7L3, HDAC3, HDAC2, HDAC1, SMARCC1, RNF2, DNMT1, PHF21A, SETD2, HDAC6
GO:0044265~cellular macromolecule catabolic process	116	2.83482	DZIP3, RNF216, SAE1, DNASE1L1, DCPS, CUL2, G2E3, CUL5, BTBD1, WWP2, FBXO25, RBCK1, ERAP1, FBXO21, RNF34, ANAPC1, ANAPC2, ZC3HC1, DTL, MAGOH, ANAPC4, SKP2, PSMA2, PSMA1, UHRF1, UHRF2, UBR7, FBXO18, SIAH1A, PSMA4, PSMA3, RAD18, ASB3, ANAPC7, XRN2, ASB7, FBXO11, PNPT1, ANAPC10, NEDD8, SKP1A, PSMA7, RBX1, PSMB4, EIF3E, PSMB2, FBXW2, TRAF7, UBE2D1, NTHL1, SMG5, SMG7, CDC23, SMG1, RNPS1, CASC3, SUGT1, …
GO:0006268~DNA unwinding during replication	8	2.80395	TOP1, MCM7, TOP3A, TOP1MT, MCM2, MCM4, TOP3B, MCM6
GO:0030036~actin cytoskeleton organization	36	2.79162	TLN1, CNN3, PDGFB, CAPZA2, WASF2, CAPZA1, FHL3, ARPC4, DAAM1, CAPZB, ITGB1, ACTG1, PRR5, EZR, CNN2, SHC1, CAP1, EHD2, RHOG, PLS3, FMNL2, DBNL, ARHGEF2, FMNL3, ROCK1, ACTN4, ROCK2, TRPM7, NF1, ARHGEF17, EVL, FLNA, VASP, CORO1C, NRAS, TMSB4X
GO:0050658~RNA transport	21	2.75952	NUP133, XPO1, NUP160, CKAP5, MAGOH, HNRNPA2B1, FMR1, NUP93, NUP188, CASC3, NXF1, NUP155, QK, DDX19A, THOC7, NUP107, NUP54, EIF5A2, THOC3, LRPPRC, THOC1
GO:0051236~establishment of RNA localization	21	2.75952	NUP133, XPO1, NUP160, CKAP5, MAGOH, HNRNPA2B1, FMR1, NUP93, NUP188, CASC3, NXF1, NUP155, QK, DDX19A, THOC7, NUP107, NUP54, EIF5A2, THOC3, LRPPRC, THOC1
GO:0050657~nucleic acid transport	21	2.75952	NUP133, XPO1, NUP160, CKAP5, MAGOH, HNRNPA2B1, FMR1, NUP93, NUP188, CASC3, NXF1, NUP155, QK, DDX19A, THOC7, NUP107, NUP54, EIF5A2, THOC3, LRPPRC, THOC1
GO:0030029~actin filament-based process	38	2.72975	TLN1, CNN3, PDGFB, CAPZA2, CAPZA1, WASF2, FHL3, ARPC4, DAAM1, CAPZB, ITGB1, ACTG1, PRR5, EZR, CNN2, SHC1, CAP1, EHD2, RHOG, PLS3, FMNL2, DBNL, ARHGEF2, FMNL3, ACTN4, ROCK1, ROCK2, TRPM7, NF1, ARHGEF17, EVL, GM10080, FLNC, FLNA, VASP, CORO1C, NRAS, TMSB4X
GO:0006403~RNA localization	21	2.64844	NUP133, XPO1, NUP160, CKAP5, MAGOH, HNRNPA2B1, FMR1, NUP93, NUP188, CASC3, NXF1, NUP155, QK, DDX19A, THOC7, NUP107, NUP54, EIF5A2, THOC3, LRPPRC, THOC1
GO:0032392~DNA geometric change	8	2.50263	TOP1, MCM7, TOP3A, TOP1MT, MCM2, MCM4, TOP3B, MCM6
GO:0032508~DNA duplex unwinding	8	2.50263	TOP1, MCM7, TOP3A, TOP1MT, MCM2, MCM4, TOP3B, MCM6
GO:0016126~sterol biosynthetic process	13	2.4419	TM7SF2, CYP51, CYB5R3, HMGCR, FDPS, HMGCS1, MVK, PRKAA1, PMVK, HSD17B7, NSDHL, DHCR24, FDFT1
GO:0006265~DNA topological change	6	2.40224	TOP1, TOP3A, TOP1MT, TOP2B, TOP2A, TOP3B
GO:0016569~covalent chromatin modification	25	2.39234	MORF4L1, TAF1, YEATS4, ING4, EHMT1, EZH2, HAT1, TRRAP, KDM1A, HDAC3, PCGF2, EP300, HDAC2, BAZ1B, HDAC1, RNF2, RTF1, PRDM5, USP21, ACTL6A, SETD2, MYSM1, HELLS, MAP3K12, SMARCA4
GO:0051028~mRNA transport	19	2.382	NUP133, XPO1, NUP160, MAGOH, FMR1, NUP93, NUP188, CASC3, NXF1, NUP155, QK, DDX19A, THOC7, NUP107, NUP54, EIF5A2, THOC3, LRPPRC, THOC1
GO:0033043~regulation of organelle organization	34	2.28421	XPO1, CAPZA2, CAPZA1, CTCF, ANAPC10, ARPC5, CAPZB, ACTR3, CDC42, ARPC3, ARPC2, MAP3K1, CLASP1, TLK2, MLST8, TRP53, DBNL, ARHGEF2, CCDC88A, ROCK2, CEP192, NUSAP1, CDC23, CENPE, EVL, YWHAH, MAD2L1, TMOD3, TMSB4X, MAPRE1, STMN1, DST, NEK6, HDAC6
GO:0043254~regulation of protein complex assembly	17	2.22181	ATF7IP, DBNL, CAPZA2, CAPZA1, EVL, ARPC5, CAPZB, ACTR3, ARPC3, ARPC2, MAP3K1, TMOD3, TMSB4X, CAND1, MAPRE1, MLST8, STMN1
GO:0000910~cytokinesis	11	2.16389	ROCK1, PRC1, STX2, ROCK2, INCENP, NUSAP1, BIN3, BIRC5, ANLN, AURKB, DAXX
GO:0051493~regulation of cytoskeleton organization	24	2.14474	XPO1, DBNL, ARHGEF2, CCDC88A, CEP192, ROCK2, CAPZA2, CAPZA1, EVL, CENPE, ARPC5, CAPZB, ACTR3, ARPC3, ARPC2, MAP3K1, TMOD3, TMSB4X, CLASP1, MAPRE1, MLST8, STMN1, DST, HDAC6
GO:0006333~chromatin assembly or disassembly	23	2.06354	HIST1H2AB, MORF4L1, HIST1H2AC, HIST1H2AF, ARID4B, NAP1L1, CBX3, CBX1, NAP1L4, HIST2H2AB, H2AFV, HIST1H2BL, H2AFY, HELLS, CHD3, HIST1H2BF, HIST1H2BG, H2AFJ, MCM2, KAT5, HIST2H2BB, BAZ1B, SMARCC1, SMARCA5, HIST1H2AK, HIST1H2AN, SMARCA4
GO:0032272~negative regulation of protein polymerization	9	2.05798	DBNL, CAPZA2, CAPZA1, TMOD3, TMSB4X, EVL, MAPRE1, STMN1, CAPZB
GO:0031333~negative regulation of protein complex assembly	9	2.05798	DBNL, CAPZA2, CAPZA1, TMOD3, TMSB4X, EVL, MAPRE1, STMN1, CAPZB
GO:0006694~steroid biosynthetic process	16	2.03297	TM7SF2, CYB5R3, CYP51, HMGCR, HSD17B12, HMGCS1, FDPS, LSS, PMVK, TECR, FDFT1, PRKAA1, MVK, HSD17B7, DHCR24, NSDHL
GO:0007126~meiosis	17	2.01273	SPIN1, MKI67, SYCE2, RBM7, TOPBP1, MLH3, SMC3, RAD50, KLHDC3, RPA1, PPP1CA, PSMD13, SIAH1A, CKS2, SMC1A, XRN1, STAG2
GO:0051327~M phase of meiotic cell cycle	17	2.01273	SPIN1, MKI67, SYCE2, RBM7, TOPBP1, MLH3, SMC3, RAD50, KLHDC3, RPA1, PPP1CA, PSMD13, SIAH1A, CKS2, SMC1A, XRN1, STAG2

## Sheet: Cluster 5
Supplementary Table 4: Generated GO Terms (biological processes) from gene expression cluster 5, p < 0.001, count ≥ 5
Term	Count	-LOG10(p-value)	Genes
GO:0006412~translation	29	6.89243	RPL36A, NARS, PSTK, MRPS12, EIF5, EIF5A, VARS, RPS2, KARS, EIF3A, MRPL17, MRPL55, EIF2B2, MARS, EIF2B5, MRPL52, CARS, MRPL4, MRPS7, ETF1, EIF2B1, EIF4G1, MRPL23, TARS, GSPT1, MRPS18A, EIF2S2, HARS, CARS2
GO:0043434~response to peptide hormone stimulus	10	3.52693	AKT1, ZFP106, EIF4EBP1, EIF4EBP2, SOCS7, MTOR, EIF2B2, EIF2B1, EIF2B5, SCAP
GO:0043038~amino acid activation	8	3.19788	TARS, CARS, NARS, HARS, CARS2, VARS, KARS, MARS
GO:0043039~tRNA aminoacylation	8	3.19788	TARS, CARS, NARS, HARS, CARS2, VARS, KARS, MARS
GO:0006418~tRNA aminoacylation for protein translation	8	3.19788	TARS, CARS, NARS, HARS, CARS2, VARS, KARS, MARS
GO:0006399~tRNA metabolic process	12	2.98967	TARS, TSEN54, CARS, NARS, METTL1, HARS, CARS2, QTRT1, VARS, MTO1, KARS, MARS
GO:0009719~response to endogenous stimulus	12	2.80509	AKT1, ZFP106, EIF4EBP1, EIF4EBP2, NR4A2, SOCS7, MTOR, EIF2B2, EIF2B1, LATS1, EIF2B5, SCAP
GO:0006417~regulation of translation	10	2.64534	AKT1, EIF4G1, EIF4EBP1, EIF4EBP2, PSTK, EIF5A, PTMS, MIF4GD, EIF2B5, GATC
GO:0032868~response to insulin stimulus	7	2.51248	AKT1, ZFP106, EIF4EBP1, EIF4EBP2, SOCS7, MTOR, SCAP
GO:0009725~response to hormone stimulus	11	2.45485	AKT1, ZFP106, EIF4EBP1, EIF4EBP2, SOCS7, MTOR, EIF2B2, EIF2B1, LATS1, EIF2B5, SCAP
GO:0010001~glial cell differentiation	6	2.4049	METRN, NAB1, PHGDH, EIF2B2, EIF2B1, EIF2B5, GM8096
GO:0034660~ncRNA metabolic process	15	2.29315	CARS, TSEN54, NARS, EXOSC4, EXOSC5, QTRT1, VARS, KARS, TARS, METTL1, HARS, CARS2, FTSJ1, MTO1, MARS
GO:0042063~gliogenesis	6	2.20812	METRN, NAB1, PHGDH, EIF2B2, EIF2B1, EIF2B5, GM8096
GO:0008286~insulin receptor signaling pathway	5	2.10948	AKT1, ZFP106, EIF4EBP1, EIF4EBP2, SOCS7

## Sheet: Cluster 6
Supplementary Table 4: Generated GO Terms (biological processes) from gene expression cluster 6, p < 0.001, count ≥ 5
Term	Count	-LOG10(p-value)	Genes
GO:0007166~cell surface receptor linked signal transduction	94	12.4858	ITGB3BP, ADCY4, FGF18, NRP1, ACVRL1, LTBP4, PREX2, GRIK5, LPAR4, ITPKB, DDR2, TGFB2, S1PR2, EDNRA, S1PR3, EDNRB, AGTR2, S1PR1, KLHL6, HEY1, CXCR4, GALR3, GAB1, NSG1, CALCRL, GNG4, BOC, APLN, RAMP2, CD3E, MRGPRF, THY1, CTNNBIP1, GRB10, AGTR1A, CCR2, CX3CR1, PYGO1, AKAP7, TGFB1I1, ADAMTS2, PTAFR, ADAMTS5, FGFR2, TWSG1, C3AR1, NDN, PTH1R, BEX1, GPR65, CXXC4, GNG11, NMB, EPHB3, TCF7L1, IGSF10, APLNR,…
GO:0007155~cell adhesion	55	9.57242	DLC1, THRA, NRP1, ATP1B2, CLDN5, DDR2, TGFB2, CD93, PCP4, TGFBI, ESAM, BOC, EGFL6, ICAM2, CDHR5, CERCAM, SIRPA, THY1, AMIGO2, PGM5, CD36, CD34, CPXM1, VCAN, MADCAM1, MFAP4, JAM3, AOC3, CDH5, CLDN15, COL6A6, FAT4, BCL2, TEK, COL6A2, COL6A1, SCARB1, DPT, TNXB, NID2, MCAM, PCDH17, COL5A1, PCDH18, VWF, LYVE1, LAMA4, COL14A1, SNED1, STAB1, FREM2, FBLN5, CDON, PECAM1, ANTXR1
GO:0022610~biological adhesion	55	9.57242	DLC1, THRA, NRP1, ATP1B2, CLDN5, DDR2, TGFB2, CD93, PCP4, TGFBI, ESAM, BOC, EGFL6, ICAM2, CDHR5, CERCAM, SIRPA, THY1, AMIGO2, PGM5, CD36, CD34, CPXM1, VCAN, MADCAM1, MFAP4, JAM3, AOC3, CDH5, CLDN15, COL6A6, FAT4, BCL2, TEK, COL6A2, COL6A1, SCARB1, DPT, TNXB, NID2, MCAM, PCDH17, COL5A1, PCDH18, VWF, LYVE1, LAMA4, COL14A1, SNED1, STAB1, FREM2, FBLN5, CDON, PECAM1, ANTXR1
GO:0001944~vasculature development	42	8.78892	FGFR2, MEF2C, FGF18, ACVRL1, NRP1, IL18, COL3A1, GJA4, MEIS1, WT1, CDH5, TGFB2, EDNRA, SEMA5A, ALDH1A2, TCF21, S1PR1, HEY1, CUL7, APOE, HAND2, CXCR4, DHCR7, ROBO4, TGM2, SOX18, SOX17, NR2F2, SCG2, RECK, EGFL7, TBX3, PROX1, COL5A1, KDR, THY1, LAMA4, NOTCH1, MEOX2, AGTR1A, ECSCR, TGFBR3
GO:0001568~blood vessel development	41	8.63142	FGFR2, MEF2C, FGF18, ACVRL1, NRP1, IL18, COL3A1, GJA4, MEIS1, WT1, CDH5, TGFB2, EDNRA, SEMA5A, ALDH1A2, S1PR1, HEY1, CUL7, APOE, HAND2, CXCR4, DHCR7, ROBO4, TGM2, SOX18, SOX17, NR2F2, SCG2, RECK, EGFL7, TBX3, PROX1, COL5A1, KDR, THY1, LAMA4, NOTCH1, MEOX2, AGTR1A, ECSCR, TGFBR3
GO:0007186~G-protein coupled receptor protein signaling pathway	36	7.3902	ADCY4, C3AR1, PREX2, PTH1R, GPR65, LPAR4, GNG11, NMB, EDNRA, S1PR2, S1PR3, APLNR, EDNRB, AGTR2, S1PR1, CXCR4, GALR3, TGM2, NSG1, ADRA2A, CALCRL, GNG4, APLN, RAMP2, GNAO1, MRGPRF, NPR3, FZD4, P2RY12, GNGT2, PENK, AGTR1A, RGS5, CX3CR1, CCR2, PTAFR
GO:0040012~regulation of locomotion	21	6.48239	EGFL7, SNCA, ABI3, NEXN, THY1, LAMA4, S1PR1, CXCR4, BCL2, GAB1, TEK, CCR2, PECAM1, ROBO4, GHRL, TGFBR3, UNC5C, TIE1, SST, PIK3R1, SCG2
GO:0006935~chemotaxis	18	6.32217	C3AR1, S100A8, ENPP2, S100A9, CCL9, PF4, CCL5, SLIT2, FCGR3, TGFB2, CCL12, RAC2, CXCL13, CX3CR1, ECSCR, FCER1G, PTAFR, SCG2
GO:0042330~taxis	18	6.32217	C3AR1, S100A8, ENPP2, S100A9, CCL9, PF4, CCL5, SLIT2, FCGR3, TGFB2, CCL12, RAC2, CXCL13, CX3CR1, ECSCR, FCER1G, PTAFR, SCG2
GO:0048514~blood vessel morphogenesis	30	5.45994	FGFR2, MEF2C, FGF18, NRP1, ACVRL1, IL18, MEIS1, WT1, TGFB2, SEMA5A, EDNRA, S1PR1, HEY1, CUL7, HAND2, CXCR4, APOE, ROBO4, TGM2, SOX18, SOX17, NR2F2, SCG2, EGFL7, PROX1, KDR, THY1, NOTCH1, MEOX2, ECSCR
GO:0030198~extracellular matrix organization	19	5.36919	RECK, TNXB, EGFL6, ELN, COL3A1, CCDC80, OLFML2A, ABI3BP, COL5A1, TGFB2, FBLN1, TNFRSF11B, EGFLAM, SMOC1, FBLN5, TGFBI, MYH11, ADAMTS2, DPT
GO:0009611~response to wounding	33	5.32698	LY86, F13A1, PF4, CCL5, MDK, C1QC, TGFB2, S1PR3, C1RA, BCL2, PYCARD, CFI, TPSB2, PAPSS2, F10, FCGR1, FCGR3, P2RY12, C1QA, C1QB, CCL12, VWF, THBD, STAB1, SERPINF2, CXCL13, CCR2, PECAM1, TFPI, GAP43, LCP1, PTAFR, MYH10
GO:0007610~behavior	33	5.26928	C3AR1, S100A8, ENPP2, IL18, S100A9, SNCA, CCL9, PF4, CCL5, TGFB2, S1PR2, AGTR2, RAC2, BCL2, PTN, FCER1G, SCG2, GNAO1, SLIT2, FCGR3, CCL12, PTGDS, PENK, S100B, CXCL13, AGTR1A, CX3CR1, ECSCR, GHRL, ABAT, PYY, SYNGAP1, PTAFR
GO:0030334~regulation of cell migration	18	5.24213	EGFL7, ABI3, NEXN, THY1, LAMA4, S1PR1, CXCR4, BCL2, GAB1, TEK, CCR2, PECAM1, ROBO4, TGFBR3, UNC5C, TIE1, SST, PIK3R1
GO:0006952~defense response	34	4.93458	IFIH1, RARRES2, WFDC15B, LY86, CCL5, C1QC, LEAP2, APOA4, S1PR3, C1RA, BCL2, PYCARD, CLEC2D, FCER1G, CFI, TPSB2, DDAH2, DEFA17, CLEC2H, CAMP, FCGR1, FCGR3, C1QA, DDX58, C1QB, CCL12, ABCC9, PENK, STAB1, SERPINF2, CXCL13, KCNJ8, CCR2, DEFA3, PTAFR
GO:0051270~regulation of cell motion	19	4.88388	NRP1, EGFL7, ABI3, NEXN, THY1, LAMA4, S1PR1, CXCR4, BCL2, GAB1, TEK, CCR2, PECAM1, ROBO4, TGFBR3, UNC5C, TIE1, SST, PIK3R1
GO:0006911~phagocytosis, engulfment	7	4.66257	GULP1, FCER1G, ABCA1, SIRPA, FCGR1, FCGR3, ELMO1
GO:0008037~cell recognition	9	4.57034	NRP1, NDN, ZP3, SCARB1, SPA17, SIRPA, FCGR1, GAP43, FCGR3
GO:0016337~cell-cell adhesion	22	4.38852	THRA, TNXB, ICAM2, CLDN5, CDHR5, PCDH17, MCAM, CDH5, CLDN15, THY1, TGFB2, PCDH18, AMIGO2, CD93, FAT4, FREM2, PCP4, CDON, BCL2, TEK, ESAM, BOC
GO:0045165~cell fate commitment	16	4.36905	MEF2C, FGFR2, SOX6, ISL1, PROX1, NKX6-1, KDR, TGFB2, NOTCH3, NOTCH1, BCL2, CDON, NEUROD1, TGFB1I1, GAP43, NKX2-2
GO:0030182~neuron differentiation	31	3.97217	LST1, NRP1, NDN, EPHB3, TGFB2, SEMA5A, ALDH1A2, SRPX, S1PR1, CXCR4, BCL2, BOC, NKX2-2, TUBB3, ISL1, NKX6-1, SLIT2, THY1, SLIT3, NOTCH3, CDKN1C, SEMA6A, PPP1R9A, SLITRK4, NOTCH1, GHRL, SYNGAP1, SMARCA1, SLITRK6, GAP43, MYH10
GO:0006955~immune response	32	3.9433	CPLX2, IFIH1, LST1, ENPP2, LY86, IL18, CCL9, ACP5, PF4, FCGRT, CCL5, C1QC, APOA4, C1RA, KLHL6, OASL2, FCER1G, CFI, FCGR1, FCGR3, PSMB9, C1QA, DDX58, C1QB, CCL12, ABCC9, CXCL13, KCNJ8, CX3CR1, CCR2, GBP2, LCP1
GO:0043062~extracellular structure organization	20	3.79932	RECK, TNXB, EGFL6, ELN, COL3A1, CCDC80, OLFML2A, ABI3BP, COL5A1, TGFB2, TNFRSF11B, FBLN1, EGFLAM, SMOC1, FBLN5, TGFBI, MYH11, ADAMTS2, LRP4, DPT
GO:0001525~angiogenesis	21	3.76791	FGFR2, FGF18, NRP1, ACVRL1, EGFL7, IL18, MEIS1, KDR, THY1, EDNRA, SEMA5A, NOTCH1, S1PR1, MEOX2, CXCR4, HAND2, ECSCR, ROBO4, SOX18, SOX17, SCG2
GO:0007411~axon guidance	12	3.52971	SEMA5A, SEMA6A, NRP1, CXCR4, EPHB3, ISL1, BOC, GAP43, SLIT2, SLIT3, MYH10, TGFB2
GO:0007626~locomotory behavior	20	3.48561	C3AR1, GNAO1, S100A8, ENPP2, S100A9, SNCA, CCL9, PF4, CCL5, SLIT2, FCGR3, TGFB2, CCL12, RAC2, CXCL13, CX3CR1, ECSCR, FCER1G, PTAFR, SCG2
GO:0001655~urogenital system development	18	3.47921	PLAG1, FGFR2, RBP4, UPK3A, TET2, WT1, SLIT2, TCF21, NOTCH1, GPC3, OSR1, SFRP1, KCNJ8, AGTR1A, BCL2, PYGO1, ADAMTS1, LRP4
GO:0007409~axonogenesis	17	3.45477	NRP1, NDN, ISL1, EPHB3, SLIT2, TGFB2, SLIT3, SEMA5A, SEMA6A, NOTCH1, SLITRK4, CXCR4, BCL2, SLITRK6, BOC, GAP43, MYH10
GO:0031175~neuron projection development	21	3.35804	LST1, NRP1, NDN, EPHB3, ISL1, SLIT2, TGFB2, SLIT3, SEMA5A, SEMA6A, NOTCH1, SLITRK4, PPP1R9A, CXCR4, BCL2, GHRL, SLITRK6, SYNGAP1, BOC, GAP43, MYH10
GO:0000904~cell morphogenesis involved in differentiation	20	3.25407	NRP1, NDN, EPHB3, ISL1, PROX1, SLIT2, TGFB2, SLIT3, SEMA5A, SEMA6A, DAB2, NOTCH1, SLITRK4, CXCR4, BCL2, ANTXR1, SLITRK6, BOC, GAP43, MYH10
GO:0007507~heart development	26	3.25207	DLC1, MEF2C, RBP4, NRP1, TBX3, PDLIM3, SOX6, ISL1, PROX1, COL5A1, TGFB2, EDNRA, ALDH1A2, NOTCH1, OSR1, KCNJ8, HAND2, GATA6, CASP7, GAB1, MYH11, TGFBR3, VCAN, ADAMTS1, CALCRL, MYH10
GO:0019318~hexose metabolic process	22	3.19987	RBP4, LDHB, GNPDA1, HKDC1, PDK3, ALDOB, FBP1, GALT, IGF2, G6PC2, PGM3, GALM, PPP1R3C, RENBP, PGM5, GBE1, PYGL, PPP1R1A, INS2, CHST15, INS1, FABP5
GO:0006928~cell motion	29	3.19592	NRP1, NDN, S100A9, PF4, EPHB3, TGFB2, SEMA5A, EDNRB, APOA1, CXCR4, FCER1G, SCARB1, NR2F2, BOC, SCG2, ISL1, SIRPA, SLIT2, KDR, ELMO1, SLIT3, FCGR3, SEMA6A, FYN, CD34, CX3CR1, CELF3, GAP43, MYH10
GO:0048666~neuron development	24	3.12657	LST1, NRP1, NDN, EPHB3, ISL1, SLIT2, THY1, TGFB2, SLIT3, CDKN1C, SEMA5A, SEMA6A, NOTCH1, SLITRK4, PPP1R9A, SRPX, CXCR4, BCL2, GHRL, SLITRK6, SYNGAP1, BOC, GAP43, MYH10
GO:0007187~G-protein signaling, coupled to cyclic nucleotide second messenger	8	3.105	P2RY12, S1PR3, ADCY4, AGTR2, S1PR1, PTH1R, CALCRL, NPR3
GO:0030155~regulation of cell adhesion	14	3.04721	TESC, TNXB, EGFL6, IL18, CCDC80, CYTH3, ABI3BP, LAMA4, S1PR1, EGFLAM, SMOC1, BCL2, TGM2, PIK3R1
GO:0001822~kidney development	14	2.97464	FGFR2, TCF21, GPC3, OSR1, AGTR1A, KCNJ8, BCL2, PYGO1, ADAMTS1, UPK3A, TET2, WT1, LRP4, SLIT2
GO:0048667~cell morphogenesis involved in neuron differentiation	17	2.94427	NRP1, NDN, ISL1, EPHB3, SLIT2, TGFB2, SLIT3, SEMA5A, SEMA6A, NOTCH1, SLITRK4, CXCR4, BCL2, SLITRK6, BOC, GAP43, MYH10
GO:0030595~leukocyte chemotaxis	7	2.90372	S100A9, CX3CR1, FCER1G, PF4, SCG2, FCGR3, TGFB2
GO:0060326~cell chemotaxis	7	2.90372	S100A9, CX3CR1, FCER1G, PF4, SCG2, FCGR3, TGFB2
GO:0002684~positive regulation of immune system process	17	2.88632	CD3E, IL18, UNC93B1, ITPKB, C1QC, FCGR1, FCGR3, TGFB2, THY1, C1QA, C1QB, C1RA, KLHL6, HLX, FCER1G, IL2RG, CFI
GO:0048812~neuron projection morphogenesis	17	2.88632	NRP1, NDN, ISL1, EPHB3, SLIT2, TGFB2, SLIT3, SEMA5A, SEMA6A, NOTCH1, SLITRK4, CXCR4, BCL2, SLITRK6, BOC, GAP43, MYH10
GO:0045596~negative regulation of cell differentiation	20	2.88566	TWSG1, NRP1, TBX3, BEX1, PF4, ISL1, MEIS1, NKX6-1, THY1, TGFB2, NOTCH3, NOTCH1, HLX, INSIG1, CLEC2D, TGFBR3, TGFB1I1, SYNGAP1, NKX2-2, PIK3R1
GO:0055065~metal ion homeostasis	12	2.88496	TESC, S1PR1, S100B, NDN, APOE, BCL2, PTH1R, TGM2, RGN, GHRL, UPK3A, KDR
GO:0019935~cyclic-nucleotide-mediated signaling	8	2.82631	P2RY12, S1PR3, ADCY4, AGTR2, S1PR1, PTH1R, CALCRL, NPR3
GO:0006909~phagocytosis	9	2.82052	CD36, GULP1, FCER1G, SCARB1, ABCA1, SIRPA, FCGR1, FCGR3, ELMO1
GO:0007167~enzyme linked receptor protein signaling pathway	28	2.82025	FGFR2, TWSG1, FGF18, NRP1, ACVRL1, NDN, LTBP4, GRIK5, BEX1, EPHB3, DDR2, TGFB2, IGSF10, GAB1, TEK, PIK3R1, CSF1R, KDR, EPHA3, GRB10, TGFBR3, AKAP7, INS2, SYNGAP1, BAMBI, HPGD, GFRA2, LRP4
GO:0030301~cholesterol transport	7	2.74593	APOA1, CD36, APOE, NPC1L1, SCARB1, ABCA1, GPIHBP1
GO:0015918~sterol transport	7	2.74593	APOA1, CD36, APOE, NPC1L1, SCARB1, ABCA1, GPIHBP1
GO:0050778~positive regulation of immune response	13	2.74245	CD3E, UNC93B1, FCGR1, C1QC, TGFB2, THY1, FCGR3, C1QA, C1QB, C1RA, KLHL6, FCER1G, CFI
GO:0007389~pattern specification process	22	2.73192	FGFR2, NRP1, TBX3, DYNC2LI1, TCF7L1, NKX6-1, CTNNBIP1, SEMA5A, EDNRA, ALDH1A2, NOTCH1, HOXD8, SFRP1, MEOX2, MEOX1, CXCR4, SFRP2, NEUROD1, RFX3, NR2F2, SYNGAP1, LRP4
GO:0005996~monosaccharide metabolic process	22	2.73192	RBP4, LDHB, GNPDA1, HKDC1, PDK3, ALDOB, FBP1, GALT, IGF2, G6PC2, PGM3, GALM, PPP1R3C, RENBP, PGM5, GBE1, PYGL, PPP1R1A, INS2, CHST15, INS1, FABP5
GO:0034637~cellular carbohydrate biosynthetic process	11	2.72888	PGM3, RBP4, PPP1R3C, GNPDA1, GBE1, ALDOB, FBP1, CHST15, CERCAM, PTAFR, G6PC2
GO:0048584~positive regulation of response to stimulus	17	2.71946	CD3E, UNC93B1, C1QC, FCGR1, FCGR3, THY1, TGFB2, C1QA, C1QB, C1RA, S1PR1, KLHL6, TGM2, FCER1G, GHRL, CFI, SCG2
GO:0060284~regulation of cell development	16	2.6133	NRP1, TBX3, BEX1, ISL1, MEIS1, PROX1, NKX6-1, THY1, NOTCH3, NOTCH1, BCL2, CDON, TGFBR3, SYNGAP1, BOC, NKX2-2
GO:0007188~G-protein signaling, coupled to cAMP nucleotide second messenger	7	2.60106	P2RY12, S1PR3, ADCY4, S1PR1, PTH1R, CALCRL, NPR3
GO:0040013~negative regulation of locomotion	7	2.60106	EGFL7, BCL2, ROBO4, TGFBR3, GHRL, TIE1, THY1
GO:0050900~leukocyte migration	8	2.5825	CD34, S100A9, CX3CR1, FCER1G, PF4, SCG2, FCGR3, TGFB2
GO:0048858~cell projection morphogenesis	18	2.57162	NRP1, NDN, DYNC2LI1, EPHB3, ISL1, SLIT2, TGFB2, SLIT3, SEMA5A, SEMA6A, NOTCH1, SLITRK4, CXCR4, BCL2, SLITRK6, BOC, GAP43, MYH10
GO:0060348~bone development	14	2.51734	MEF2C, FGFR2, FGF18, TWSG1, THRA, PTH1R, ACP5, IGF2, IGSF10, BCL2, INSIG1, PTN, PAPSS2, IGFBP5
GO:0051050~positive regulation of transport	14	2.51734	RBP4, LST1, SNCA, NNAT, SIRPA, FCGR1, THY1, FCGR3, P2RY12, GPC3, PYCARD, GHRL, FCER1G, HIP1
GO:0031589~cell-substrate adhesion	10	2.4887	DLC1, VWF, TNXB, SNED1, BCL2, TEK, ANTXR1, NID2, SIRPA, THY1
GO:0006954~inflammatory response	18	2.4765	LY86, CCL5, C1QC, FCGR1, FCGR3, C1QA, C1QB, S1PR3, C1RA, CCL12, CXCL13, STAB1, SERPINF2, CCR2, PYCARD, CFI, TPSB2, PTAFR
GO:0045785~positive regulation of cell adhesion	8	2.47153	EGFLAM, TNXB, EGFL6, SMOC1, TGM2, CCDC80, CYTH3, ABI3BP
GO:0006006~glucose metabolic process	17	2.41463	LDHB, RBP4, HKDC1, PDK3, ALDOB, FBP1, IGF2, G6PC2, PGM3, PPP1R3C, PGM5, GBE1, PYGL, PPP1R1A, INS2, INS1, FABP5
GO:0030808~regulation of nucleotide biosynthetic process	8	2.36697	EDNRA, S1PR3, ADCY4, S1PR1, PTH1R, GUCY1A2, CALCRL, NPR3
GO:0030802~regulation of cyclic nucleotide biosynthetic process	8	2.36697	EDNRA, S1PR3, ADCY4, S1PR1, PTH1R, GUCY1A2, CALCRL, NPR3
GO:0008284~positive regulation of cell proliferation	24	2.36053	FGFR2, FGF18, TBX3, MARCKSL1, CD3E, IL18, PTH1R, BEX1, RASIP1, CNTFR, DDR2, PROX1, KDR, TGFB2, ALDH1A2, NOTCH1, OSR2, S1PR1, RAC2, BCL2, HLX, TGM2, CALCRL, SCG2
GO:0019933~cAMP-mediated signaling	7	2.3436	P2RY12, S1PR3, ADCY4, S1PR1, PTH1R, CALCRL, NPR3
GO:0032103~positive regulation of response to external stimulus	7	2.3436	S1PR1, TGM2, FCER1G, GHRL, FCGR1, SCG2, FCGR3
GO:0002253~activation of immune response	10	2.32889	C1QA, C1QB, C1RA, KLHL6, CD3E, UNC93B1, FCER1G, CFI, C1QC, THY1
GO:0030036~actin cytoskeleton organization	19	2.32054	RHOJ, DLC1, TNXB, AIF1, ELN, S100A9, PDLIM3, SIRPA, PROX1, ELMO1, PPP1R9A, RAC2, BCL2, MYH11, GHRL, CNN1, ANTXR1, LCP1, MYH10
GO:0002250~adaptive immune response	10	2.25363	C1QA, C1QB, C1RA, KLHL6, IL18, FCER1G, CFI, C1QC, FCGR1, FCGR3
GO:0002460~adaptive immune response based on somatic recombination of immune receptors built from immunoglobulin superfamily domains	10	2.25363	C1QA, C1QB, C1RA, KLHL6, IL18, FCER1G, CFI, C1QC, FCGR1, FCGR3
GO:0048663~neuron fate commitment	6	2.23663	NOTCH3, NOTCH1, ISL1, NKX6-1, NKX2-2, TGFB2
GO:0045664~regulation of neuron differentiation	11	2.21087	NOTCH3, NOTCH1, NRP1, BCL2, BEX1, ISL1, SYNGAP1, MEIS1, NKX6-1, NKX2-2, THY1
GO:0007169~transmembrane receptor protein tyrosine kinase signaling pathway	20	2.18969	FGFR2, FGF18, NRP1, NDN, GRIK5, BEX1, EPHB3, DDR2, KDR, EPHA3, IGSF10, GRB10, GAB1, TEK, INS2, SYNGAP1, LRP4, GFRA2, PIK3R1, CSF1R
GO:0014706~striated muscle tissue development	14	2.18542	MEF2C, RBP4, MEOX2, GATA6, HLX, ELN, PDLIM3, MYH11, TGFBR3, NR2F2, PROX1, LRP4, MYH10, TGFB2
GO:0055074~calcium ion homeostasis	10	2.18122	S1PR1, S100B, NDN, APOE, BCL2, PTH1R, TGM2, RGN, GHRL, KDR
GO:0050764~regulation of phagocytosis	5	2.17956	FCER1G, SCARB1, SIRPA, FCGR1, FCGR3
GO:0030799~regulation of cyclic nucleotide metabolic process	8	2.17487	EDNRA, S1PR3, ADCY4, S1PR1, PTH1R, GUCY1A2, CALCRL, NPR3
GO:0055080~cation homeostasis	16	2.16528	TESC, FECH, NDN, PTH1R, UPK3A, KDR, EDNRB, S1PR1, ALAS2, S100B, APOE, BCL2, SLC26A9, TGM2, RGN, GHRL
GO:0000902~cell morphogenesis	24	2.15681	LST1, NRP1, NDN, DYNC2LI1, UPK3A, SOX6, EPHB3, ISL1, PROX1, SLIT2, SLIT3, TGFB2, SEMA5A, SEMA6A, DAB2, NOTCH1, SLITRK4, CXCR4, BCL2, ANTXR1, SLITRK6, BOC, GAP43, MYH10
GO:0050801~ion homeostasis	22	2.14916	TESC, PLP1, FECH, NDN, UGT8A, PTH1R, SNCA, GRIK5, UPK3A, KDR, EDNRB, ALAS2, S1PR1, S100B, FYN, APOE, BCL2, SLC26A9, TGM2, GHRL, RGN, PMP22
GO:0016051~carbohydrate biosynthetic process	12	2.13108	PGM3, RBP4, PPP1R3C, GNPDA1, GBE1, B3GALNT1, ALDOB, FBP1, CHST15, CERCAM, PTAFR, G6PC2
GO:0032990~cell part morphogenesis	18	2.12915	NRP1, NDN, DYNC2LI1, EPHB3, ISL1, SLIT2, TGFB2, SLIT3, SEMA5A, SEMA6A, NOTCH1, SLITRK4, CXCR4, BCL2, SLITRK6, BOC, GAP43, MYH10
GO:0030336~negative regulation of cell migration	6	2.10414	EGFL7, BCL2, ROBO4, TGFBR3, TIE1, THY1
GO:0045665~negative regulation of neuron differentiation	6	2.10414	NOTCH3, NOTCH1, BEX1, ISL1, MEIS1, NKX2-2
GO:0016064~immunoglobulin mediated immune response	8	2.0864	C1QA, C1QB, C1RA, FCER1G, CFI, C1QC, FCGR1, FCGR3
GO:0019724~B cell mediated immunity	8	2.0864	C1QA, C1QB, C1RA, FCER1G, CFI, C1QC, FCGR1, FCGR3
GO:0051094~positive regulation of developmental process	19	2.0817	FGFR2, FGF18, TESC, BEX1, ITPKB, PROX1, NKX6-1, TGFB2, ADAMTS9, NOTCH1, CD36, GATA6, CDON, BCL2, HLX, GHRL, IL2RG, BOC, NKX2-2
GO:0048878~chemical homeostasis	26	2.08091	TESC, PLP1, FECH, NDN, UGT8A, PTH1R, SNCA, GRIK5, UPK3A, KDR, MTTP, EDNRB, S1PR1, ALAS2, S100B, APOE, FYN, BCL2, SLC26A9, TGM2, NPC1L1, RGN, NEUROD1, GHRL, SCARB1, PMP22
GO:0042060~wound healing	12	2.07426	P2RY12, VWF, THBD, F10, F13A1, PECAM1, TFPI, PF4, PAPSS2, GAP43, MYH10, TGFB2
GO:0006875~cellular metal ion homeostasis	10	2.04439	TESC, S1PR1, S100B, NDN, APOE, BCL2, PTH1R, TGM2, RGN, GHRL
GO:0032989~cellular component morphogenesis	26	2.02206	NRP1, LST1, NDN, DYNC2LI1, SOX6, EPHB3, TGFB2, SEMA5A, DAB2, CXCR4, BCL2, BOC, UPK3A, ISL1, PROX1, SLIT2, SLIT3, SEMA6A, NOTCH1, SLITRK4, MYH11, ANTXR1, SLITRK6, PMP22, GAP43, MYH10
GO:0042742~defense response to bacterium	7	2.02084	WFDC15B, STAB1, CAMP, DEFA3, FCER1G, DEFA17, FCGR1, LEAP2
GO:0006958~complement activation, classical pathway	5	2.01242	C1QA, C1QB, C1RA, CFI, C1QC
GO:0051605~protein maturation by peptide bond cleavage	8	2.00247	C1QA, PCSK2, C1QB, PCSK1, C1RA, CFI, ADAMTS2, C1QC
GO:0006140~regulation of nucleotide metabolic process	8	2.00247	EDNRA, S1PR3, ADCY4, S1PR1, PTH1R, GUCY1A2, CALCRL, NPR3
GO:0048762~mesenchymal cell differentiation	8	2.00247	FGFR2, EDNRA, ALDH1A2, EDNRB, NOTCH1, HAND2, BCL2, ISL1
GO:0046165~alcohol biosynthetic process	8	2.00247	PGM3, RBP4, GNPDA1, ALDOB, FBP1, CHST15, PTAFR, G6PC2

## Sheet: Cluster 7
Supplementary Table 4: Generated GO Terms (biological processes) from gene expression cluster 7, p < 0.001, count ≥ 5
Term	Count	-LOG10(p-value)	Genes
GO:0022610~biological adhesion	49	8.41777	AEBP1, CLDN4, CLDN6, FERMT2, POSTN, CXADR, APP, WISP1, RHOB, COL12A1, SPON2, SPON1, RET, PCDHGA10, PDPN, JUP, IGSF5, DDR1, LAMC2, CLDN18, TNC, ITGB4, PTK7, NEDD9, ITGB5, CDH1, CDH3, CDH6, ALCAM, RGMB, ITGB6, PKD1, SCARB2, THBS1, GPNMB, THBS2, SPP1, B4GALT1, OLR1, COL15A1, HSPG2, COL5A3, EMILIN2, KITL, LAMA2, LAMA3, CDH16, ITGA5, CDH11
GO:0007155~cell adhesion	49	8.41777	AEBP1, CLDN4, CLDN6, FERMT2, POSTN, CXADR, APP, WISP1, RHOB, COL12A1, SPON2, SPON1, RET, PCDHGA10, PDPN, JUP, IGSF5, DDR1, LAMC2, CLDN18, TNC, ITGB4, PTK7, NEDD9, ITGB5, CDH1, CDH3, CDH6, ALCAM, RGMB, ITGB6, PKD1, SCARB2, THBS1, GPNMB, THBS2, SPP1, B4GALT1, OLR1, COL15A1, HSPG2, COL5A3, EMILIN2, KITL, LAMA2, LAMA3, CDH16, ITGA5, CDH11
GO:0043062~extracellular structure organization	23	6.20649	ALS2, B4GALT1, KLK8, ELF3, TNC, OLFML2B, TGFBR1, HSPG2, POSTN, COL5A3, COL5A2, APLP2, ATP7A, SMOC2, APP, SERPINB5, CRISPLD2, P4HA1, KAZALD1, P2RX2, PDGFRA, MUC5AC, LOX
GO:0030198~extracellular matrix organization	19	6.07751	B4GALT1, ELF3, OLFML2B, TGFBR1, HSPG2, POSTN, COL5A3, COL5A2, APLP2, ATP7A, SMOC2, APP, SERPINB5, CRISPLD2, P4HA1, KAZALD1, PDGFRA, MUC5AC, LOX
GO:0007166~cell surface receptor linked signal transduction	69	5.59978	FGF7, PDGFA, EFNA1, OSMR, EDN1, CSPG4, TGFB3, LPAR1, GLI3, ACVR1B, APP, WNT4, WISP1, RSPO3, FGF2, ANGPT2, CLN3, RET, GPR176, ADAM10, TLE4, TLE1, VEGFC, DDR1, VEGFA, ROR1, PDGFRA, ADAM17, PDGFRB, ADAM19, ZFAND5, EID2, NKD2, CCL2, ERBB3, ADCYAP1R1, ITGB4, BMPR2, PTK7, ITGB5, EPHB2, RGMB, ITGB6, PKD1, PIK3R3, KIF3A, GDE1, TGFBR1, SPHK1, FZD1, MALT1, HGF, RGS17, HS1BP3, RGS16, EPHA1, STAT3, FZD6, NCS…
GO:0035295~tube development	31	5.2625	ENAH, FGF7, PDGFA, LMO4, CSF1, EDN1, PTK7, BMPR2, TGFB3, CDH1, GREM1, GLI3, ADA, WNT4, HOXA5, CRISPLD2, HS6ST1, LOX, TRAF6, FGF2, B4GALT1, RET, MAN1A2, PDPN, CFTR, FZD6, ATP7A, DDR1, ADM, VEGFA, PDGFRA
GO:0006954~inflammatory response	22	4.98922	CXCL1, B4GALT1, CCL2, OLR1, ELF3, LY96, CRP, ATRN, SPHK1, SAA3, TLR3, SGMS1, MECOM, CCL7, TRF, STAT3, CD55, SERPINA3N, ITGB6, CFH, THBS1, KDM6B
GO:0048286~lung alveolus development	9	4.93183	ATP7A, MAN1A2, PDPN, PDGFA, VEGFA, TGFB3, BMPR2, HS6ST1, ADA
GO:0008015~blood circulation	15	4.29421	ACTA2, PTGS1, G6PDX, EDN1, BMPR2, ATP1A1, CFTR, CALCB, ACE, CHD7, NISCH, NPY, HMOX1, VEGFA, P2RX2
GO:0003013~circulatory system process	15	4.29421	ACTA2, PTGS1, G6PDX, EDN1, BMPR2, ATP1A1, CFTR, CALCB, ACE, CHD7, NISCH, NPY, HMOX1, VEGFA, P2RX2
GO:0006952~defense response	30	4.2371	ALS2, CXCL1, CCL2, ELF3, CRP, TLR3, SGMS1, TRF, CCL7, TAPBP, B2M, TMEM173, ITGB6, CFH, THBS1, B4GALT1, IL18R1, PLD1, OLR1, LY96, SPHK1, ATRN, SAA3, MALT1, MECOM, STAT3, LSP1, CD55, SERPINA3N, KDM6B
GO:0030324~lung development	17	4.17215	FGF7, MAN1A2, PDGFA, PDPN, BMPR2, TGFB3, CFTR, GLI3, ADA, ATP7A, HOXA5, CRISPLD2, VEGFA, PDGFRA, HS6ST1, LOX, FGF2
GO:0008217~regulation of blood pressure	11	4.16949	ACE, NISCH, NPY, ACTA2, HMOX1, PTGS1, EDN1, G6PDX, P2RX2, BMPR2, ATP1A1
GO:0060541~respiratory system development	18	4.14395	FGF7, MAN1A2, PDGFA, PDPN, BMPR2, TGFB3, CFTR, GLI3, ADA, ATP7A, CHD7, HOXA5, CRISPLD2, VEGFA, PDGFRA, HS6ST1, LOX, FGF2
GO:0050905~neuromuscular process	9	4.12494	CLN3, APP, TPP1, UCHL1, HEXB, GAA, FABP7, APLP2, FOXS1
GO:0009611~response to wounding	28	4.09792	CXCL1, CCL2, ELF3, CRP, TLR3, SGMS1, TRF, CCL7, ARG1, ITGB6, CFH, THBS1, TFPI2, B4GALT1, KLK8, OLR1, LY96, ATRN, SPHK1, SAA3, MECOM, STAT3, PROC, CD55, SERPINA3N, CTSB, PROS1, KDM6B
GO:0060429~epithelium development	28	4.09792	ENAH, ELF3, LMO4, CSF1, TNC, PTGS1, PTK7, SPRR2F, GREM1, GLI3, WNT4, HOXA5, TRAF6, IVL, FGF2, B4GALT1, RET, CEBPB, PSAP, FZD1, MECOM, FZD6, DDR1, VEGFC, ADM, SERPINB5, VEGFA, CAR9
GO:0030323~respiratory tube development	17	4.09654	FGF7, MAN1A2, PDGFA, PDPN, BMPR2, TGFB3, CFTR, GLI3, ADA, ATP7A, HOXA5, CRISPLD2, VEGFA, PDGFRA, HS6ST1, LOX, FGF2
GO:0007610~behavior	28	4.05195	ALS2, CCK, CCL2, HEXB, UCHL1, PPT1, CCL7, APLP2, EPHB2, APP, CHD7, ROBO1, SEMA3F, CLN3, KLK8, EGR2, STAT3, CPT1A, ATP7A, LSP1, NPY, ITGA5, P2RX2, GAA, AMOT, UCHL3, CMTM3, CMTM6
GO:0007631~feeding behavior	8	3.56207	APP, CCK, NPY, UCHL1, UCHL3, APLP2, STAT3, CPT1A
GO:0007169~transmembrane receptor protein tyrosine kinase signaling pathway	22	3.5568	ZFAND5, RET, FGF7, CCL2, ERBB3, EFNA1, CSPG4, BMPR2, PTK7, HGF, EPHA1, STAT3, EPHB2, DDR1, VEGFC, VEGFA, ROR1, PDGFRA, PDGFRB, PIK3R3, FGF2, ANGPT2
GO:0050885~neuromuscular process controlling balance	7	3.5342	CLN3, APP, TPP1, HEXB, GAA, APLP2, FOXS1
GO:0001666~response to hypoxia	12	3.47022	ACE, ATP1B1, ECE1, PDGFA, HMOX1, EDN1, VEGFA, P2RX2, TGFB3, MMP2, SOD3, TRF
GO:0070482~response to oxygen levels	12	3.38104	ACE, ATP1B1, ECE1, PDGFA, HMOX1, EDN1, VEGFA, P2RX2, TGFB3, MMP2, SOD3, TRF
GO:0007167~enzyme linked receptor protein signaling pathway	27	3.20709	ZFAND5, EID2, FGF7, CCL2, EFNA1, PDGFA, ERBB3, PTK7, BMPR2, CSPG4, TGFB3, EPHB2, RGMB, PIK3R3, ANGPT2, FGF2, RET, TGFBR1, HGF, EPHA1, STAT3, DDR1, VEGFC, VEGFA, ROR1, PDGFRA, PDGFRB
GO:0007626~locomotory behavior	18	3.15857	ALS2, CCL2, HEXB, UCHL1, PPT1, CCL7, APLP2, ATP7A, LSP1, APP, CHD7, ROBO1, SEMA3F, GAA, AMOT, UCHL3, CMTM3, CMTM6
GO:0048010~vascular endothelial growth factor receptor signaling pathway	6	3.15326	VEGFC, CCL2, VEGFA, BMPR2, PDGFRA, PDGFRB
GO:0001944~vasculature development	27	3.09543	ZFAND5, PDGFA, EDN1, PRRX1, CSPG4, MMP2, ZFP36L1, APOB, CHD7, HMOX1, CCBE1, RHOB, PKD1, HS6ST1, LOX, ANGPT2, FGF2, B4GALT1, PDPN, TGFBR1, SPHK1, MMP19, ATP7A, VEGFC, VEGFA, AMOT, COL1A1
GO:0006955~immune response	27	2.95209	CXCL1, CCL2, VTCN1, TLR3, CCL7, ADA, B2M, TMEM173, CFH, CLEC4D, MR1, TRAF6, SPON2, IL18R1, H2-M9, OLR1, LY96, COLEC12, MALT1, PRKCD, ATP7A, CBLB, CD55, CXCL14, VEGFA, PLCG2, ADAM17
GO:0030574~collagen catabolic process	6	2.94636	MMP10, MMP8, MMP19, MMP7, MMP3, MMP2
GO:0044243~multicellular organismal catabolic process	6	2.94636	MMP10, MMP8, MMP19, MMP7, MMP3, MMP2
GO:0048812~neuron projection morphogenesis	16	2.93657	ALS2, KLK8, KLF7, ENAH, CCK, EGR2, UCHL1, NRN1, GLI3, EPHB2, ATP7A, ALCAM, APP, ROBO1, NUMB, DCLK1
GO:0051046~regulation of secretion	12	2.90181	B4GALT1, PFKL, LRRC32, HMOX1, EDN1, KRT20, TRAF6, ADA, CPT1A, SCAMP5, IL11, NGF
GO:0044057~regulation of system process	16	2.88217	KLK8, EGR2, NCDN, CALD1, EDN1, BMPR2, ATP1A1, PXK, ADA, TRF, EPHB2, LNPEP, LAMA2, NISCH, GAA, NGF
GO:0043067~regulation of programmed cell death	43	2.88174	ERBB3, TGFB3, HSPA1A, CDH1, PPT1, SGMS1, GLI3, ADA, IKBIP, CASP4, ERCC6, TRP53BP2, BOK, HMOX1, SHISA5, MKL1, TRAF6, FGF2, SPP1, B4GALT1, CLN3, CEBPB, TGFBR1, SPHK1, MALT1, HGF, BIRC3, PRKCD, KITL, DAPK1, PROC, ATP7A, XPA, TRIM35, UACA, BTG1, PLCG2, CASP12, VEGFA, RIPK3, ADAM17, BIK, NGF
GO:0048732~gland development	18	2.85615	B4GALT1, CEBPB, FGF7, ELF3, PSAP, TGFBR1, CSF1, TNC, TGFB3, CDH1, GLI3, AHR, DDR1, WNT4, HOXA5, SERPINB5, VEGFA, FGF2
GO:0010941~regulation of cell death	43	2.83332	ERBB3, TGFB3, HSPA1A, CDH1, PPT1, SGMS1, GLI3, ADA, IKBIP, CASP4, ERCC6, TRP53BP2, BOK, HMOX1, SHISA5, MKL1, TRAF6, FGF2, SPP1, B4GALT1, CLN3, CEBPB, TGFBR1, SPHK1, MALT1, HGF, BIRC3, PRKCD, KITL, DAPK1, PROC, ATP7A, XPA, TRIM35, UACA, BTG1, PLCG2, CASP12, VEGFA, RIPK3, ADAM17, BIK, NGF
GO:0042755~eating behavior	5	2.78151	CCK, UCHL1, UCHL3, STAT3, CPT1A
GO:0048729~tissue morphogenesis	22	2.76292	RET, ENAH, FGF7, CSF1, LMO4, TNC, BMPR2, PTK7, GREM1, GLI3, SNAI1, FZD6, ATP7A, DDR1, VEGFC, WNT4, ADM, HOXA5, SERPINB5, CAR9, TRAF6, KLF4
GO:0051048~negative regulation of secretion	6	2.76263	PFKL, LRRC32, HMOX1, EDN1, ADA, IL11
GO:0051051~negative regulation of transport	10	2.74225	UACA, PFKL, LRRC32, HMOX1, EDN1, PKD2, NEDD4L, PXK, ADA, IL11
GO:0006979~response to oxidative stress	13	2.69903	ALS2, PTGS1, G6PDX, ATP7A, GPX2, XPA, ERCC6, UCP2, HMOX1, GPX3, IDH1, COL1A1, NQO1
GO:0006917~induction of apoptosis	19	2.67838	CEBPB, TGFBR1, TGFB3, PRKCD, DAPK1, IKBIP, XPA, TRIM35, ERCC6, UACA, CASP4, BOK, TRP53BP2, HMOX1, SHISA5, CASP12, RIPK3, BIK, TRAF6
GO:0012502~induction of programmed cell death	19	2.67838	CEBPB, TGFBR1, TGFB3, PRKCD, DAPK1, IKBIP, XPA, TRIM35, ERCC6, UACA, CASP4, BOK, TRP53BP2, HMOX1, SHISA5, CASP12, RIPK3, BIK, TRAF6
GO:0048858~cell projection morphogenesis	17	2.66945	ALS2, KLK8, KLF7, ENAH, KIF3A, CCK, EGR2, UCHL1, NRN1, GLI3, EPHB2, ATP7A, ALCAM, APP, ROBO1, NUMB, DCLK1
GO:0031344~regulation of cell projection organization	9	2.63594	KLK8, PLXNB1, EFNA1, TGFBR1, SEMA3F, TGFB3, SEMA4D, NGF, EPHB2
GO:0051969~regulation of transmission of nerve impulse	11	2.632	LAMA2, LNPEP, KLK8, NISCH, EGR2, NCDN, EDN1, PXK, TRF, NGF, EPHB2
GO:0001568~blood vessel development	25	2.58822	PDGFA, EDN1, CSPG4, PRRX1, MMP2, ZFP36L1, APOB, CHD7, HMOX1, CCBE1, RHOB, PKD1, HS6ST1, LOX, ANGPT2, FGF2, B4GALT1, TGFBR1, SPHK1, MMP19, ATP7A, VEGFC, VEGFA, AMOT, COL1A1
GO:0031644~regulation of neurological system process	11	2.56197	LAMA2, LNPEP, KLK8, NISCH, EGR2, NCDN, EDN1, PXK, TRF, NGF, EPHB2
GO:0006928~cell motion	25	2.55533	ZFAND5, ENAH, CCK, CSPG4, GLI3, EPHB2, ALCAM, APOB, APP, ROBO1, SEMA3F, DCLK1, B4GALT1, KLF7, RET, EGR2, PDPN, TGFBR1, KITL, NAV1, VEGFA, LRP6, ADAM17, AMOT, SRGAP1
GO:0045765~regulation of angiogenesis	8	2.54244	COL4A2, SERPINF1, BTG1, RHOB, AMOT, THBS1, ANGPT2, FGF2
GO:0009792~embryonic development ending in birth or egg hatching	33	2.52555	ZFAND5, ENAH, LMO4, EDN1, TGFB3, PTK7, PRRX1, CDH1, GLI3, ADA, ACVR1B, APOB, CHD7, ECE1, HOXA5, TRP53BP2, RSPO3, PKD2, PKD1, HS6ST1, TRAF6, CEBPB, ADAM10, KIF3A, TGFBR1, HSPG2, MECOM, FZD6, ADM, PDGFRA, PDGFRB, AMOT, NCOR2
GO:0048568~embryonic organ development	18	2.49803	CEBPB, EFNA1, TGFBR1, EDN1, PRRX1, TGFB3, HSPG2, GLI3, ADA, FZD6, CHD7, ADM, HOXA5, RSPO3, VEGFA, PKD2, LRP6, HS6ST1
GO:0042981~regulation of apoptosis	41	2.46886	ERBB3, TGFB3, HSPA1A, CDH1, PPT1, SGMS1, GLI3, ADA, IKBIP, CASP4, ERCC6, TRP53BP2, BOK, HMOX1, SHISA5, MKL1, TRAF6, SPP1, B4GALT1, CLN3, CEBPB, TGFBR1, SPHK1, MALT1, HGF, BIRC3, PRKCD, KITL, DAPK1, PROC, ATP7A, XPA, TRIM35, UACA, BTG1, CASP12, VEGFA, RIPK3, ADAM17, BIK, NGF
GO:0035239~tube morphogenesis	18	2.45652	B4GALT1, RET, ENAH, PDPN, CSF1, LMO4, EDN1, PTK7, CDH1, GREM1, GLI3, FZD6, DDR1, WNT4, ADM, HOXA5, VEGFA, TRAF6
GO:0001501~skeletal system development	21	2.44106	ZFAND5, BMP1, TGFBR1, HEXB, EDN1, HSPG2, PRRX1, TGFB3, GLI3, COL5A2, MMP2, ATP7A, HOXA5, KAZALD1, PDGFRA, PKD1, PDGFRB, COL1A1, TRAF6, GPNMB, SPP1
GO:0048705~skeletal system morphogenesis	12	2.38241	ZFAND5, HOXA5, TGFBR1, TGFB3, PRRX1, HSPG2, PDGFRA, PDGFRB, PKD1, COL1A1, GLI3, MMP2
GO:0048747~muscle fiber development	7	2.36122	ALS2, APP, ACTA1, TNC, P2RX2, RCAN1, CXADR
GO:0043009~chordate embryonic development	32	2.33099	ZFAND5, ENAH, LMO4, EDN1, TGFB3, PTK7, PRRX1, CDH1, GLI3, ADA, ACVR1B, APOB, CHD7, ECE1, HOXA5, RSPO3, PKD2, PKD1, HS6ST1, TRAF6, CEBPB, ADAM10, KIF3A, TGFBR1, HSPG2, MECOM, FZD6, ADM, PDGFRA, PDGFRB, AMOT, NCOR2
GO:0060341~regulation of cellular localization	14	2.29635	B4GALT1, PFKL, LRRC32, EDN1, TGFB3, KRT20, GLI3, CPT1A, IL11, UACA, HMOX1, TRAF6, SCAMP5, NGF
GO:0031175~neuron projection development	17	2.27819	ALS2, KLK8, KLF7, ENAH, CCK, EGR2, UCHL1, NRN1, GLI3, EPHB2, ATP7A, ALCAM, APP, ROBO1, NUMB, IGSF9, DCLK1
GO:0002009~morphogenesis of an epithelium	17	2.27819	RET, ENAH, CSF1, LMO4, TNC, PTK7, GREM1, GLI3, FZD6, DDR1, VEGFC, WNT4, ADM, HOXA5, SERPINB5, CAR9, TRAF6
GO:0010769~regulation of cell morphogenesis involved in differentiation	8	2.26646	KLK8, PLXNB1, EFNA1, SEMA3F, TGFB3, SEMA4D, NGF, EPHB2
GO:0032990~cell part morphogenesis	17	2.23839	ALS2, KLK8, KLF7, ENAH, KIF3A, CCK, EGR2, UCHL1, NRN1, GLI3, EPHB2, ATP7A, ALCAM, APP, ROBO1, NUMB, DCLK1
GO:0032102~negative regulation of response to external stimulus	6	2.18862	GPX2, CLN3, KLK8, UACA, FABP7, ADA
GO:0032963~collagen metabolic process	6	2.18862	MMP10, MMP8, MMP19, MMP7, MMP3, MMP2
GO:0033619~membrane protein proteolysis	5	2.18626	NCSTN, ADAM10, BACE2, ADAM17, ADAM19
GO:0006509~membrane protein ectodomain proteolysis	5	2.18626	NCSTN, ADAM10, BACE2, ADAM17, ADAM19
GO:0044093~positive regulation of molecular function	24	2.18057	ALS2, ADCY7, EFNA1, CSF1, SPHK1, EDN1, CSPG4, TGFB3, EDA2R, TLR3, MALT1, HGF, LPAR1, KITL, NCSTN, ATP7A, SERINC2, SERINC5, ERCC6, UACA, BTG1, PLCG2, HTR2B, FGF2
GO:0048598~embryonic morphogenesis	24	2.18057	ENAH, RET, EFNA1, LMO4, TGFBR1, EDN1, HSPG2, PRRX1, PTK7, BMPR2, TGFB3, GREM1, MECOM, GLI3, FZD6, VEGFC, WNT4, CHD7, ADM, HOXA5, RSPO3, LRP6, AMOT, TRAF6
GO:0022604~regulation of cell morphogenesis	12	2.16271	KLK8, PDPN, PLXNB1, EFNA1, SEMA3F, FERMT2, TGFB3, CDC42SE1, SEMA4D, PALMD, NGF, EPHB2
GO:0040014~regulation of multicellular organism growth	9	2.16029	APP, CHD7, CSF1, LGMN, G6PDX, ATRN, PCSK1N, STAT3, FOXS1
GO:0050770~regulation of axonogenesis	7	2.16012	KLK8, PLXNB1, EFNA1, SEMA3F, SEMA4D, NGF, EPHB2
GO:0048771~tissue remodeling	7	2.16012	ATP7A, NOX4, NCDN, ELF3, TPP1, VEGFA, CSPG4
GO:0060562~epithelial tube morphogenesis	13	2.15485	DDR1, RET, WNT4, ENAH, ADM, HOXA5, LMO4, CSF1, PTK7, TRAF6, GREM1, GLI3, FZD6
GO:0010648~negative regulation of cell communication	16	2.14046	CLN3, EID2, FSTL3, TGFB3, CDC42SE1, RGS17, RGS16, GREM1, PRKCD, DDIT4, CBLB, WNT4, LRP1, RGS2, LRP6, TNK1
GO:0048667~cell morphogenesis involved in neuron differentiation	14	2.11232	KLF7, ENAH, EGR2, CCK, UCHL1, NRN1, GLI3, EPHB2, ATP7A, ALCAM, APP, ROBO1, NUMB, DCLK1
GO:0000902~cell morphogenesis	22	2.10851	ALS2, NOX4, KLK8, KLF7, ENAH, KIF3A, CCK, EGR2, PDPN, UCHL1, PTK7, HGF, NRN1, GLI3, EPHB2, ALCAM, ATP7A, WNT4, APP, ROBO1, NUMB, DCLK1
GO:0048585~negative regulation of response to stimulus	8	2.10413	GPX2, CLN3, KLK8, UACA, CDC42SE1, FABP7, PRKCD, ADA
GO:0035148~tube lumen formation	9	2.09174	RET, WNT4, ENAH, ADM, LMO4, PTK7, CDH1, TRAF6, FZD6
GO:0048741~skeletal muscle fiber development	6	2.07414	ALS2, APP, ACTA1, TNC, P2RX2, RCAN1
GO:0007040~lysosome organization	6	2.07414	CLN3, CHMP5, TPP1, HEXB, GAA, PPT1
GO:0044259~multicellular organismal macromolecule metabolic process	6	2.07414	MMP10, MMP8, MMP19, MMP7, MMP3, MMP2
GO:0010720~positive regulation of cell development	7	2.06843	VEGFC, SERPINF1, PLXNB1, TGFB3, SEMA4D, NGF, EPHB2
GO:0007409~axonogenesis	13	2.06087	KLF7, ENAH, CCK, EGR2, UCHL1, NRN1, GLI3, EPHB2, ALCAM, APP, ROBO1, NUMB, DCLK1
GO:0048871~multicellular organismal homeostasis	8	2.02854	GPX2, NOX4, NCDN, TPP1, CSF1, VEGFA, PDGFRB, STAT3
GO:0030855~epithelial cell differentiation	12	2.01244	B4GALT1, WNT4, CEBPB, ELF3, PSAP, PTGS1, VEGFA, PTK7, FZD1, SPRR2F, FGF2, IVL
GO:0009968~negative regulation of signal transduction	15	2.00244	EID2, FSTL3, TGFB3, CDC42SE1, RGS17, RGS16, GREM1, PRKCD, DDIT4, CBLB, WNT4, LRP1, RGS2, LRP6, TNK1

## Sheet: Cluster 8
Supplementary Table 4: Generated GO Terms (biological processes) from gene expression cluster 8, p < 0.001, count ≥ 5
Term	Count	-LOG10(p-value)	Genes
GO:0055114~oxidation reduction	71	11.0757	EHHADH, PRDX4, ALDH1L2, OGDH, UQCRQ, PECR, NDUFS6, ERO1LB, MSRA, CPOX, NDUFS8, VKORC1, HADH, NDUFS3, ATP6, ALDH6A1, QDPR, NDUFA13, DECR1, GRHPR, NDUFC1, NDUFA11, OGFOD2, PYCR1, ALDH7A1, PYCR2, H2-KE6, MECR, ALDH9A1, MDH1, UQCRB, PYCRL, NDUFB5, ACADSB, ALDH18A1, NDUFB6, ADHFE1, NDUFB7, FDX1, NDUFB8, NDUFB9, HSD17B13, AASS, PAH, NDUFB2, GLRX2, BC003331, IVD, IDH2, ALDH4A1, PNPO, CCS, ALDH1A7, QSOX2…
GO:0022900~electron transport chain	27	9.09522	NDUFB5, NDUFB6, NDUFB7, NDUFB8, FDX1, NDUFB9, UQCRQ, GLRX2, NDUFB2, NDUFS6, ERO1LB, NDUFS8, NDUFS3, ETFB, ATP6, NDUFA6, NDUFA13, NDUFC1, NDUFA1, NDUFA11, SOD2, NDUFV3, SDHB, COX2, NDUFV1, NDUFV2, UQCRB
GO:0006091~generation of precursor metabolites and energy	37	6.76698	ATP5E, NDUFB5, NDUFB6, NDUFB7, PHKB, NDUFB8, FDX1, NDUFB9, AASS, OGDH, UQCRQ, GLRX2, NDUFB2, NDUFS6, ERO1LB, NDUFS8, IDH2, GNMT, NDUFS3, ETFB, ATP6, NDUFA6, SUCLG1, ATP5F1, NDUFA13, NDUFC1, NDUFA1, SOD2, NDUFA11, NDUFV3, SDHB, GCK, COX2, NDUFV1, NDUFV2, UQCRB, MDH1
GO:0015031~protein transport	75	6.55627	GNPTG, SEC24A, VPS54, TIMM17B, USE1, SRP19, SRPR, RAB6B, RAB26, SEC24D, SAR1A, RAMP1, DNAJC19, RAB27A, GM4184, ATG9A, RAB39B, RINT1, YIF1A, CLPX, NDUFA11, MYRIP, SEC61B, TIMM8A1, TIMM8A2, BNIP1, STXBP5, ATG4A, ARCN1, PSEN2, USO1, TOM1, SIL1, SRP72, STX5A, SRP9, COPE, SEC23B, SEC61G, SERP1, MON1A, COPZ2, RAB3A, ARFGAP3, RAB3D, LMF1, COPZ1, BET1, RPL38, LMAN1, SEC62, MIA3, STX18, TMED3, NUP210, SEC…
GO:0045184~establishment of protein localization	75	6.42042	GNPTG, SEC24A, VPS54, TIMM17B, USE1, SRP19, SRPR, RAB6B, RAB26, SEC24D, SAR1A, RAMP1, DNAJC19, RAB27A, GM4184, ATG9A, RAB39B, RINT1, YIF1A, CLPX, NDUFA11, MYRIP, SEC61B, TIMM8A1, TIMM8A2, BNIP1, STXBP5, ATG4A, ARCN1, PSEN2, USO1, TOM1, SIL1, SRP72, STX5A, SRP9, COPE, SEC23B, SEC61G, SERP1, MON1A, COPZ2, RAB3A, ARFGAP3, RAB3D, LMF1, COPZ1, BET1, RPL38, LMAN1, SEC62, MIA3, STX18, TMED3, NUP210, SEC…
GO:0008104~protein localization	77	5.15916	GNPTG, SEC24A, VPS54, TIMM17B, USE1, SRP19, OS9, SRPR, RAB6B, RAB26, SEC24D, SAR1A, RAMP1, DNAJC19, RAB27A, GM4184, ATG9A, RAB39B, RINT1, YIF1A, CLPX, NDUFA11, MYRIP, SEC61B, TIMM8A1, TIMM8A2, BNIP1, STXBP5, ATG4A, ARCN1, PSEN2, USO1, TOM1, SIL1, SRP72, STX5A, SRP9, COPE, SEC23B, SEC61G, SERP1, MON1A, COPZ2, RAB3A, ARFGAP3, RAB3D, LMF1, COPZ1, BET1, RPL38, LMAN1, SEC62, MIA3, STX18, TMED3, NUP210…
GO:0009081~branched chain family amino acid metabolic process	8	4.97352	BCKDHA, ALDH6A1, BCKDK, BCAT2, BCKDHB, HIBCH, GHR, AUH
GO:0008652~cellular amino acid biosynthetic process	11	4.49143	PYCRL, PYCR1, CTH, PYCR2, BCAT2, ALDH18A1, ALDH4A1, ASNSD1, ASNS, PAH, THNSL2
GO:0009083~branched chain family amino acid catabolic process	6	4.24596	BCKDHA, BCKDK, BCAT2, BCKDHB, HIBCH, AUH
GO:0009309~amine biosynthetic process	12	3.92776	PYCRL, PYCR1, CTH, PYCR2, BCAT2, ALDH18A1, ALDH4A1, ASNSD1, ASNS, PAH, THNSL2, AZIN1
GO:0006561~proline biosynthetic process	5	3.73531	PYCRL, PYCR1, PYCR2, ALDH18A1, ALDH4A1
GO:0009063~cellular amino acid catabolic process	10	3.68876	BCKDHA, BCKDK, AHCY, BCAT2, BCKDHB, GSTZ1, AASS, PAH, HIBCH, AUH
GO:0016192~vesicle-mediated transport	45	3.56336	COPZ2, RAB3A, ARFGAP3, SEC24A, RAB3D, VPS54, COPZ1, USE1, BET1, LMAN1, APLP1, MIA3, STX18, SEC22B, RAB6B, SEC24D, SAR1A, ELMOD2, GHR, RAB27A, RINT1, YIF1A, MON2, PREB, SCFD1, COG5, BNIP1, P2RX1, SCFD2, STXBP5, MCFD2, ARCN1, USO1, GOSR2, YIPF5, VAMP2, CELA2A, MAPK8IP1, SYTL1, STX5A, SLC17A9, EPN1, TRAPPC10, SEC23B, COPE
GO:0009064~glutamine family amino acid metabolic process	10	3.43492	GLS2, PYCRL, PYCR1, PYCR2, ALDH18A1, GFPT1, GGH, ALDH4A1, ASNSD1, ASNS
GO:0055085~transmembrane transport	34	3.42053	SLC9A9, ATP5E, SLC39A11, TIMM17B, SLC7A8, SFXN2, SEC62, TPCN1, SLC2A8, SLC35B1, SLC30A1, NUP210, SLC25A29, SLC39A7, SLC39A5, TRAM1, KCNQ1, DNAJC19, SEC61A1, ATP6, GM4184, SLC12A8, RRBP1, ATP5F1, ABCB6, TIMM8A1, SEC61B, SLC16A7, TIMM8A2, TOMM40L, SIL1, SLC46A3, SLC25A15, SEC61G, SERP1
GO:0006560~proline metabolic process	5	3.28639	PYCRL, PYCR1, PYCR2, ALDH18A1, ALDH4A1
GO:0006986~response to unfolded protein	11	3.0591	ERP44, HERPUD1, SYVN1, CREB3L1, EDEM3, DNAJC3, HERPUD2, EDEM1, UBXN4, MANF, SERP1
GO:0009310~amine catabolic process	10	2.99523	BCKDHA, BCKDK, AHCY, BCAT2, BCKDHB, GSTZ1, AASS, PAH, HIBCH, AUH
GO:0009084~glutamine family amino acid biosynthetic process	5	2.94655	PYCRL, PYCR1, PYCR2, ALDH18A1, ALDH4A1
GO:0016054~organic acid catabolic process	11	2.63992	BCKDHA, BCKDK, AHCY, BCAT2, EHHADH, BCKDHB, GSTZ1, AASS, PAH, HIBCH, AUH
GO:0046395~carboxylic acid catabolic process	11	2.63992	BCKDHA, BCKDK, AHCY, BCAT2, EHHADH, BCKDHB, GSTZ1, AASS, PAH, HIBCH, AUH
GO:0018130~heterocycle biosynthetic process	10	2.62682	PYCRL, PYCR1, GPHN, PYCR2, ALDH18A1, PCBD1, ADK, CPOX, QDPR, ALDH4A1
GO:0016053~organic acid biosynthetic process	16	2.54591	PYCRL, ALDH18A1, BCAT2, RNPEPL1, ASNSD1, ASNS, PAH, PYCR1, PECR, PYCR2, CTH, MLYCD, ALDH4A1, THNSL2, H2-KE6, MECR
GO:0046394~carboxylic acid biosynthetic process	16	2.54591	PYCRL, ALDH18A1, BCAT2, RNPEPL1, ASNSD1, ASNS, PAH, PYCR1, PECR, PYCR2, CTH, MLYCD, ALDH4A1, THNSL2, H2-KE6, MECR
GO:0006886~intracellular protein transport	30	2.44536	COPZ2, GNPTG, SEC24A, COPZ1, TIMM17B, RPL38, SRP19, SRPR, STX18, SEC24D, SAR1A, RAMP1, SEC61A1, RAB27A, GM4184, MYRIP, TIMM8A1, TIMM8A2, ATG4A, TSC2, ARCN1, USO1, TOM1, GOSR2, SRP72, SYTL1, STX5A, SEC61G, SEC23B, SRP9, TOB1
GO:0048193~Golgi vesicle transport	11	2.22409	COG5, SEC24A, COPZ1, USE1, BET1, SEC22B, LMAN1, SEC24D, MON2, COPE, SEC23B
GO:0032940~secretion by cell	16	2.12846	RAB3A, ARFGAP3, RAB3D, LMF1, USE1, SCFD1, MIA3, P2RX1, SCFD2, STXBP5, VAMP2, SYTL1, GLP1R, SLC17A9, MON1A, RAB27A
GO:0034613~cellular protein localization	30	2.08777	COPZ2, GNPTG, SEC24A, COPZ1, TIMM17B, RPL38, SRP19, SRPR, STX18, SEC24D, SAR1A, RAMP1, SEC61A1, RAB27A, GM4184, MYRIP, TIMM8A1, TIMM8A2, ATG4A, TSC2, ARCN1, USO1, TOM1, GOSR2, SRP72, SYTL1, STX5A, SEC61G, SEC23B, SRP9, TOB1
GO:0051186~cofactor metabolic process	19	2.06255	SUCLG1, EHHADH, GGT1, COQ9, ALDH1L2, SOD2, ISCA1, ISCU, DBT, SDHB, PGLS, GPHN, EIF2AK1, GCK, MLYCD, CPOX, VKORC1, IDH2, MDH1
GO:0070727~cellular macromolecule localization	30	2.03688	COPZ2, GNPTG, SEC24A, COPZ1, TIMM17B, RPL38, SRP19, SRPR, STX18, SEC24D, SAR1A, RAMP1, SEC61A1, RAB27A, GM4184, MYRIP, TIMM8A1, TIMM8A2, ATG4A, TSC2, ARCN1, USO1, TOM1, GOSR2, SRP72, SYTL1, STX5A, SEC61G, SEC23B, SRP9, TOB1
