# Supplementary material
Source: HighWire-hosted journal article supplement (https://gut.bmj.com/content/gutjnl-2018-317208)
Supplement: inline-supplementary-material-8 [file inline-supplementary-material-8.xlsx]

## Sheet: upregulated genes
Supplementary Table 7: Generated GO terms (biological processes) of upregulated genes in R1b KO cell clones vs. control clones, p < 0.05, count ≥ 5.
Term	Count	-LOG10(p-value)	Genes (list is cut off because of submission as pdf file )
GO:0043009~chordate embryonic development	29	6.62893	PTK7, PRRX1, GJA1, PAX3, ADA, GATA2, RGMA, RSPO3, HS6ST1, TWIST1, EGFR, SATB2, TCF7, TBX15, EPAS1, EOMES, SPINT1, FZD3, MFN2, DLX2, DLX1, WNT7B, KRT19, ZIC5, SIX1, PDGFRA, ROR2, FOXC1, MYH10
GO:0009792~embryonic development ending in birth or egg hatching	29	6.54821	PTK7, PRRX1, GJA1, PAX3, ADA, GATA2, RGMA, RSPO3, HS6ST1, TWIST1, EGFR, SATB2, TCF7, TBX15, EPAS1, EOMES, SPINT1, FZD3, MFN2, DLX2, DLX1, WNT7B, KRT19, ZIC5, SIX1, PDGFRA, ROR2, FOXC1, MYH10
GO:0048568~embryonic organ development	21	6.35754	EGFR, TCF7, SATB2, TBX15, EPAS1, OTX1, PRRX1, EOMES, SOBP, SPINT1, FZD3, ADA, DLX2, GATA2, WNT7B, KRT19, RSPO3, ALDH1A3, SIX1, ROR2, HS6ST1
GO:0035295~tube development	20	5.15058	FGF18, BMP2, RET, FLT1, EPAS1, PTK7, GJA1, CFTR, FZD3, PAX3, ADA, SEMA5A, RGMA, ZIC5, SIX1, PDGFRA, GDF11, HS6ST1, FOXC1, TWIST1
GO:0007167~enzyme linked receptor protein signaling pathway	20	4.9393	TXNIP, EGFR, FGF18, BMP2, RET, FLT1, FGF15, LTBP4, PTK7, PTPRN, TOM1L1, TIAM1, DOK7, ROR1, PDGFRA, GFRA1, ROR2, SH2B2, FOXC1, BMP6
GO:0048598~embryonic morphogenesis	23	4.75449	RET, TCF7, SATB2, TBX15, OTX1, PRRX1, JAG2, PTK7, EOMES, SPINT1, SOBP, FZD3, PAX3, RGMA, DLX2, WNT7B, RSPO3, ALDH1A3, ZIC5, SIX1, ROR2, FOXC1, TWIST1
GO:0016337~cell-cell adhesion	18	4.67162	SELP, RET, CLSTN1, CELSR2, L1CAM, CDH2, PTPRU, CDH3, SCARF2, JUP, NRCAM, WNT7B, PCDH1, CDH16, CDH17, FAT2, ACAN, ROR2
GO:0048729~tissue morphogenesis	18	4.62525	EGFR, BMP2, RET, JAG2, PTK7, EOMES, FZD3, PAX3, TCF7L1, TNNT2, RGMA, ALDH1A3, ZIC5, SIX1, SEMA3C, FOXC1, KLF4, TWIST1
GO:0007169~transmembrane receptor protein tyrosine kinase signaling pathway	16	4.59517	TXNIP, EGFR, FGF18, RET, FLT1, FGF15, PTK7, TOM1L1, TIAM1, DOK7, ROR1, PDGFRA, GFRA1, ROR2, FOXC1, SH2B2
GO:0001892~embryonic placenta development	9	4.24109	EGFR, GATA2, WNT7B, KRT19, EPAS1, RSPO3, EOMES, SPINT1, HS6ST1
GO:0016477~cell migration	17	4.02733	FMNL1, EGFR, SELP, SATB2, RET, FLT1, FGF15, GJA1, CDH2, PAX3, TNS1, ST14, SIX1, SEMA3C, FOXC1, MYH10, TWIST1
GO:0060429~epithelium development	18	3.92082	EGFR, BMP2, RET, PTGS1, JAG2, PTK7, GJA1, FZD3, FZD2, PAX3, SCEL, RGMA, IRF6, ALDH1A3, ZIC5, SIX1, SEMA3C, TWIST1
GO:0001890~placenta development	10	3.87943	EGFR, GATA2, WNT7B, KRT19, EPAS1, RSPO3, EOMES, SPINT1, HS6ST1, ADA
GO:0007155~cell adhesion	28	3.86012	NELL2, CLSTN1, FERMT2, PTK7, ITGB4, L1CAM, CDH2, CDH3, SCARF2, NRCAM, IGSF11, PCDH1, GP1BB, FAT2, COL6A2, ACAN, TYRO3, SELP, RET, CELSR2, PTPRU, CERCAM, JUP, WNT7B, CDH16, CDH17, ROR2, ADAM12
GO:0022610~biological adhesion	28	3.84771	NELL2, CLSTN1, FERMT2, PTK7, ITGB4, L1CAM, CDH2, CDH3, SCARF2, NRCAM, IGSF11, PCDH1, GP1BB, FAT2, COL6A2, ACAN, TYRO3, SELP, RET, CELSR2, PTPRU, CERCAM, JUP, WNT7B, CDH16, CDH17, ROR2, ADAM12
GO:0006928~cell motion	21	3.67572	FMNL1, EGFR, SELP, SATB2, RET, FLT1, FGF15, DPYSL5, GJA1, L1CAM, CDH2, PAX3, NRCAM, SEMA5A, TNS1, ST14, SIX1, SEMA3C, FOXC1, TWIST1, MYH10
GO:0001501~skeletal system development	18	3.65758	FGF18, BMP2, SATB2, TBX15, HEXA, FGFRL1, PRRX1, JAG2, NPR2, DLX2, DLX1, SIX1, PDGFRA, ACAN, ROR2, SORT1, FOXC1, BMP6
GO:0016331~morphogenesis of embryonic epithelium	9	3.48149	RGMA, RET, ALDH1A3, ZIC5, PTK7, JAG2, FZD3, PAX3, TWIST1
GO:0002009~morphogenesis of an epithelium	13	3.3098	EGFR, BMP2, RET, JAG2, PTK7, FZD3, PAX3, RGMA, ALDH1A3, SIX1, ZIC5, SEMA3C, TWIST1
GO:0014031~mesenchymal cell development	7	3.2426	RET, BMP2, FGF15, EOMES, SEMA3C, FOXC1, PAX3
GO:0048870~cell motility	17	3.20273	FMNL1, EGFR, SELP, SATB2, RET, FLT1, FGF15, GJA1, CDH2, PAX3, TNS1, ST14, SIX1, SEMA3C, FOXC1, MYH10, TWIST1
GO:0051674~localization of cell	17	3.20273	FMNL1, EGFR, SELP, SATB2, RET, FLT1, FGF15, GJA1, CDH2, PAX3, TNS1, ST14, SIX1, SEMA3C, FOXC1, MYH10, TWIST1
GO:0016055~Wnt receptor signaling pathway	11	3.19111	DKK2, TCF7, WNT7B, NKD2, RSPO3, ROR2, TLE4, CELSR2, FZD3, FZD2, TCF7L1
GO:0048762~mesenchymal cell differentiation	7	3.14388	RET, BMP2, FGF15, EOMES, SEMA3C, FOXC1, PAX3
GO:0060485~mesenchyme development	7	3.09637	RET, BMP2, FGF15, EOMES, SEMA3C, FOXC1, PAX3
GO:0007156~homophilic cell adhesion	10	2.92446	RET, PCDH1, CDH16, CDH17, CLSTN1, FAT2, CELSR2, L1CAM, CDH2, CDH3
GO:0001838~embryonic epithelial tube formation	7	2.91781	RGMA, RET, ZIC5, PTK7, FZD3, PAX3, TWIST1
GO:0006357~regulation of transcription from RNA polymerase II promoter	27	2.88079	E2F6, ONECUT3, CBX4, PRRX1, PAX3, TCF7L1, PLAGL1, GATA2, LBH, BCOR, PRL2C2, MAF, TXNIP, BMP2, SATB2, EPAS1, OTX1, TLE4, TEAD2, MED13L, SIRT1, DLX2, DLX1, NCOA1, SIX1, FOXC1, KLF4
GO:0035239~tube morphogenesis	12	2.8118	SEMA5A, RGMA, RET, BMP2, FLT1, SIX1, ZIC5, PTK7, GJA1, FZD3, PAX3, TWIST1
GO:0048514~blood vessel morphogenesis	13	2.79754	FGF18, FLT1, EPAS1, LEPR, PRRX1, GJA1, CDH2, SEMA5A, HEY1, SEMA3C, HS6ST1, FOXC1, PRL2C2
GO:0060606~tube closure	6	2.78896	RGMA, ZIC5, PTK7, FZD3, PAX3, TWIST1
GO:0001843~neural tube closure	6	2.78896	RGMA, ZIC5, PTK7, FZD3, PAX3, TWIST1
GO:0051216~cartilage development	8	2.76593	FGF18, DLX2, BMP2, SATB2, ACAN, PRRX1, ROR2, BMP6
GO:0035148~tube lumen formation	7	2.71629	RGMA, RET, ZIC5, PTK7, FZD3, PAX3, TWIST1
GO:0042475~odontogenesis of dentine-containing tooth	6	2.69017	DLX2, DLX1, BMP2, JAG2, PDGFRA, FOXC1
GO:0014020~primary neural tube formation	6	2.64297	RGMA, ZIC5, PTK7, FZD3, PAX3, TWIST1
GO:0001701~in utero embryonic development	15	2.57943	EGFR, EPAS1, EOMES, SPINT1, GJA1, ADA, MFN2, GATA2, WNT7B, KRT19, RSPO3, PDGFRA, HS6ST1, FOXC1, MYH10
GO:0042476~odontogenesis	6	2.50923	DLX2, DLX1, BMP2, JAG2, PDGFRA, FOXC1
GO:0048562~embryonic organ morphogenesis	11	2.49303	DLX2, TCF7, SATB2, TBX15, OTX1, ALDH1A3, SIX1, PRRX1, SOBP, ROR2, FZD3
GO:0001568~blood vessel development	14	2.49103	FGF18, FLT1, EPAS1, LEPR, PRRX1, SPINT1, GJA1, CDH2, SEMA5A, HEY1, SEMA3C, HS6ST1, FOXC1, PRL2C2
GO:0060562~epithelial tube morphogenesis	9	2.47974	RGMA, RET, BMP2, SIX1, ZIC5, PTK7, FZD3, PAX3, TWIST1
GO:0001944~vasculature development	14	2.40165	FGF18, FLT1, EPAS1, LEPR, PRRX1, SPINT1, GJA1, CDH2, SEMA5A, HEY1, SEMA3C, HS6ST1, FOXC1, PRL2C2
GO:0008016~regulation of heart contraction	6	2.3092	TNNT2, EPAS1, CACNA1G, GJA1, ADORA1, ADA
GO:0001841~neural tube formation	6	2.27219	RGMA, ZIC5, PTK7, FZD3, PAX3, TWIST1
GO:0014033~neural crest cell differentiation	5	2.22989	RET, FGF15, SEMA3C, FOXC1, PAX3
GO:0014032~neural crest cell development	5	2.22989	RET, FGF15, SEMA3C, FOXC1, PAX3
GO:0048469~cell maturation	7	2.19407	NRCAM, GATA2, RET, EPAS1, RPS6KA2, GDF11, GJA1
GO:0021700~developmental maturation	8	2.13936	ZDHHC15, NRCAM, GATA2, RET, EPAS1, RPS6KA2, GDF11, GJA1
GO:0051094~positive regulation of developmental process	12	2.07228	FGF18, GATA2, WNT7B, BMP2, PLXNB1, TIAM1, EOMES, GJA1, ITPKB, ADA, NGF, PRL2C2
GO:0048705~skeletal system morphogenesis	9	2.07018	FGF18, DLX2, SATB2, TBX15, SIX1, ACAN, PRRX1, PDGFRA, ROR2
GO:0042127~regulation of cell proliferation	22	2.04791	EGFR, FGF18, BMP2, ICOSL, TCF7, FGF15, CRIP2, PTGS1, FGFRL1, PRRX1, JAG2, PAX3, ADORA1, ADA, MFN2, PRL2C3, CBLB, IRF6, GDF11, CDCA7L, KLF4, PRL2C2
GO:0021915~neural tube development	7	1.98482	RGMA, TCF7, ZIC5, PTK7, FZD3, PAX3, TWIST1
GO:0007423~sensory organ development	13	1.90264	MAF, OTX1, PRRX1, JAG2, SOBP, FZD3, MFN2, ALDH1A3, SIX1, GDF11, FOXC1, KLF4, MYH10
GO:0050769~positive regulation of neurogenesis	5	1.89638	BMP2, PLXNB1, TIAM1, NGF, PRL2C2
GO:0001657~ureteric bud development	5	1.86039	RET, BMP2, SIX1, GDF11, FOXC1
GO:0045597~positive regulation of cell differentiation	10	1.7859	FGF18, WNT7B, BMP2, PLXNB1, TIAM1, EOMES, ITPKB, ADA, NGF, PRL2C2
GO:0032583~regulation of gene-specific transcription	6	1.78236	DLX2, DLX1, BMP2, CELSR2, BCOR, SIRT1
GO:0010720~positive regulation of cell development	5	1.69532	BMP2, PLXNB1, TIAM1, NGF, PRL2C2
GO:0060541~respiratory system development	8	1.68363	FGF18, EPAS1, ALDH1A3, FGFRL1, PDGFRA, HS6ST1, CFTR, ADA
GO:0022604~regulation of cell morphogenesis	7	1.67762	FGD1, PLXNB1, TIAM1, FERMT2, CDC42EP3, NGF, MYH10
GO:0001763~morphogenesis of a branching structure	8	1.66663	SEMA5A, DLX2, BMP2, FLT1, RSPO3, SIX1, SEMA3C, SPINT1
GO:0010648~negative regulation of cell communication	10	1.63285	DKK2, IRAK3, NPC1, CBLB, HTRA1, FGFRL1, RPH3AL, RGS17, PHLDA3, ADORA1
GO:0009891~positive regulation of biosynthetic process	21	1.61772	MAF, BMP2, SATB2, ICOSL, EPAS1, TEAD2, PAX3, SEC14L2, TCF7L1, PLAGL1, RAET1D, GATA2, DLX2, NCOA1, IRF6, SIX1, GUCY1A2, FOXC1, KLF2, KLF4, PRL2C2
GO:0007389~pattern specification process	13	1.59854	SATB2, FLT1, OTX1, CELSR2, TCF7L1, SEMA5A, DLX2, DLX1, SIX1, GDF11, ROR2, FOXC1, LFNG
GO:0007548~sex differentiation	8	1.58454	TCF7, LEPR, PDGFRA, ROR2, FOXC1, SIRT1, LFNG, GJB2
GO:0010551~regulation of specific transcription from RNA polymerase II promoter	5	1.57858	DLX2, DLX1, BMP2, BCOR, SIRT1
GO:0050767~regulation of neurogenesis	8	1.55303	DLX2, DLX1, BMP2, PLXNB1, TIAM1, SIX1, NGF, PRL2C2
GO:0006468~protein amino acid phosphorylation	23	1.54627	EGFR, TYRO3, RET, FLT1, MAK, PTK7, NPR2, ADORA1, CAMKK1, IRAK3, HUNK, CCNE1, RPS6KA4, MAPK12, MAPK13, RPS6KA2, GADD45G, ROR1, PDGFRA, DCLK2, ROR2, PRKAA2, MAPK8IP1
GO:0045944~positive regulation of transcription from RNA polymerase II promoter	15	1.52976	MAF, BMP2, SATB2, EPAS1, TEAD2, PAX3, TCF7L1, PLAGL1, GATA2, DLX2, NCOA1, SIX1, FOXC1, KLF4, PRL2C2
GO:0045934~negative regulation of nucleobase, nucleoside, nucleotide and nucleic acid metabolic process	16	1.49796	TXNIP, CLSPN, SATB2, RCOR2, PRRX1, CBX4, TLE4, PAX3, SIRT1, TCF7L1, DLX2, DLX1, CDA, BCOR, SCMH1, KLF4
GO:0030900~forebrain development	9	1.47976	EGFR, GATA2, DLX2, DLX1, OTX1, ALDH1A3, ZIC5, EOMES, MYH10
GO:0030182~neuron differentiation	16	1.47611	RET, RTN4RL1, JAG2, DPYSL5, EOMES, L1CAM, PAX3, KLHL1, SEMA5A, NRCAM, GATA2, DLX2, DLX1, RAC3, TUBB3, MYH10
GO:0007242~intracellular signaling cascade	30	1.4689	FGD1, RAB3B, ITPKB, RIMS2, ADORA1, DGKA, RAC3, TIAM1, GUCY1A2, DCLK2, SH2B2, PHLDA3, CNKSR2, RET, RAB8B, NPR2, ARHGAP29, RALGDS, DNAJC27, CBLB, RPS6KA4, CHRM4, ADCY9, MAPK13, RPS6KA2, PLCG2, GADD45G, ROR2, MAPK8IP1, DUSP9
GO:0051172~negative regulation of nitrogen compound metabolic process	16	1.45918	TXNIP, CLSPN, SATB2, RCOR2, PRRX1, CBX4, TLE4, PAX3, SIRT1, TCF7L1, DLX2, DLX1, CDA, BCOR, SCMH1, KLF4
GO:0048706~embryonic skeletal system development	6	1.42721	DLX2, DLX1, SATB2, TBX15, SIX1, PRRX1
GO:0007243~protein kinase cascade	11	1.41609	CNKSR2, RET, RPS6KA4, MAPK13, RPS6KA2, GADD45G, ROR2, ITPKB, MAPK8IP1, DUSP9, ADORA1
GO:0001656~metanephros development	5	1.40047	RET, BMP2, SIX1, GDF11, FOXC1
GO:0031328~positive regulation of cellular biosynthetic process	20	1.39525	MAF, BMP2, SATB2, ICOSL, EPAS1, TEAD2, PAX3, TCF7L1, PLAGL1, RAET1D, GATA2, DLX2, NCOA1, IRF6, SIX1, GUCY1A2, FOXC1, KLF2, KLF4, PRL2C2
GO:0016044~membrane organization	12	1.38768	MFN2, ZDHHC15, NRCAM, GATA2, NPC1, FNBP1, LRP12, LRP11, SORT1, SYT7, MYH10, HIP1
GO:0000165~MAPKKK cascade	7	1.37987	RET, GADD45G, ROR2, ITPKB, MAPK8IP1, DUSP9, ADORA1
GO:0007517~muscle organ development	9	1.36622	TNNT2, FGFRL1, SIX1, DOK7, FOXC1, MKX, PAX3, SIRT1, MYH10
GO:0010604~positive regulation of macromolecule metabolic process	22	1.35668	MAF, BMP2, SATB2, ICOSL, EPAS1, TEAD2, PAX3, ADORA1, TCF7L1, PLAGL1, RGMA, DLX2, GATA2, CBLB, NCOA1, IRF6, SIX1, DOK7, FOXC1, KLF2, KLF4, PRL2C2
GO:0048839~inner ear development	6	1.33523	OTX1, SIX1, JAG2, PRRX1, SOBP, FZD3
GO:0051173~positive regulation of nitrogen compound metabolic process	19	1.32793	MAF, BMP2, SATB2, EPAS1, TEAD2, PAX3, TCF7L1, PLAGL1, RAET1D, GATA2, DLX2, NCOA1, IRF6, SIX1, GUCY1A2, FOXC1, KLF2, KLF4, PRL2C2
GO:0006796~phosphate metabolic process	28	1.32712	PTK7, ADORA1, CAMKK1, CCNE1, IRAK3, DCLK2, PRKAA2, EGFR, TYRO3, RET, FLT1, PTPRG, MAK, NPR2, PTPRU, PTPRN, HUNK, RPS6KA4, MAPK12, PTP4A3, MAPK13, RPS6KA2, GADD45G, ROR1, PDGFRA, ROR2, MAPK8IP1, DUSP9
GO:0006793~phosphorus metabolic process	28	1.32712	PTK7, ADORA1, CAMKK1, CCNE1, IRAK3, DCLK2, PRKAA2, EGFR, TYRO3, RET, FLT1, PTPRG, MAK, NPR2, PTPRU, PTPRN, HUNK, RPS6KA4, MAPK12, PTP4A3, MAPK13, RPS6KA2, GADD45G, ROR1, PDGFRA, ROR2, MAPK8IP1, DUSP9
GO:0051960~regulation of nervous system development	8	1.32498	DLX2, DLX1, BMP2, PLXNB1, TIAM1, SIX1, NGF, PRL2C2
GO:0060348~bone development	7	1.31922	FGF18, BMP2, SATB2, SORT1, FOXC1, NPR2, BMP6
GO:0043062~extracellular structure organization	8	1.31202	FBLN1, WNT7B, DOK7, ACAN, PDGFRA, SPINT1, FOXC1, CDH2

## Sheet: downregulated genes
Supplementary Table 7: Generated GO terms (biological processes) of downregulated genes in R1b KO cell clones vs. control clones, p < 0.05, count ≥ 5.
Term	Count	-LOG10(p-value)	Genes (list is cut off because of submission as pdf file )
GO:0006334~nucleosome assembly	10	6.44168	H1F0, HIST1H2BC, HIST1H2BG, HIST1H2BM, HIST2H2BE, HIST1H2BJ, HIST1H3A, HIST1H2AI, HIST1H3B, HIST1H3C, HIST1H3D, HIST3H2A, HIST1H3E, HIST1H4D, HIST1H3G, HIST1H4H
GO:0031497~chromatin assembly	10	6.33936	H1F0, HIST1H2BC, HIST1H2BG, HIST1H2BM, HIST2H2BE, HIST1H2BJ, HIST1H3A, HIST1H2AI, HIST1H3B, HIST1H3C, HIST1H3D, HIST3H2A, HIST1H3E, HIST1H4D, HIST1H3G, HIST1H4H
GO:0034728~nucleosome organization	10	6.28938	H1F0, HIST1H2BC, HIST1H2BG, HIST1H2BM, HIST2H2BE, HIST1H2BJ, HIST1H3A, HIST1H2AI, HIST1H3B, HIST1H3C, HIST1H3D, HIST3H2A, HIST1H3E, HIST1H4D, HIST1H3G, HIST1H4H
GO:0065004~protein-DNA complex assembly	10	6.28938	H1F0, HIST1H2BC, HIST1H2BG, HIST1H2BM, HIST2H2BE, HIST1H2BJ, HIST1H3A, HIST1H2AI, HIST1H3B, HIST1H3C, HIST1H3D, HIST3H2A, HIST1H3E, HIST1H4D, HIST1H3G, HIST1H4H
GO:0006323~DNA packaging	10	5.24218	H1F0, HIST1H2BC, HIST1H2BG, HIST1H2BM, HIST2H2BE, HIST1H2BJ, HIST1H3A, HIST1H2AI, HIST1H3B, HIST1H3C, HIST1H3D, HIST3H2A, HIST1H3E, HIST1H4D, HIST1H3G, HIST1H4H
GO:0006333~chromatin assembly or disassembly	10	4.97022	H1F0, HIST1H2BC, HIST1H2BG, HIST1H2BM, HIST2H2BE, HIST1H2BJ, HIST1H3A, HIST1H2AI, HIST1H3B, HIST1H3C, HIST1H3D, HIST3H2A, HIST1H3E, HIST1H4D, HIST1H3G, HIST1H4H
GO:0034622~cellular macromolecular complex assembly	11	3.31432	H1F0, HIST1H2BC, HIST1H2BG, TBCE, HIST1H2BM, HIST2H2BE, HIST1H2BJ, HIST1H3A, HIST1H2AI, HIST1H3B, HIST1H3C, HIST1H3D, HIST3H2A, HIST1H4D, HIST1H3E, HIST1H3G, HIST1H4H
GO:0055114~oxidation reduction	20	3.00251	NDUFA4, CYP2C65, GPD1, SORD, CYP3A13, CYP2C68, CYP2S1, AKR1C12, PIPOX, CYP4B1, AKR1C13, ALDH3A1, C330018D20RIK, ALDH1A1, CYBB, CYP2D26, FOXRED1, IDH1, CP, ETFA
GO:0007626~locomotory behavior	11	2.99074	MYO6, CXCL5, CCL20, ENPP2, CXCL3, TBCE, ITGA1, SEPP1, LBP, APBA1, CCL17
GO:0034621~cellular macromolecular complex subunit organization	11	2.90877	H1F0, HIST1H2BC, HIST1H2BG, TBCE, HIST1H2BM, HIST2H2BE, HIST1H2BJ, HIST1H3A, HIST1H2AI, HIST1H3B, HIST1H3C, HIST1H3D, HIST3H2A, HIST1H4D, HIST1H3E, HIST1H3G, HIST1H4H
GO:0006790~sulfur metabolic process	7	2.88651	TPK1, GSTA1, GSTT1, IDH1, SULT1D1, SEPP1, GSTT3
GO:0006518~peptide metabolic process	5	2.86483	GSTA1, GSTT1, IDH1, GSTT3, TAPBP
GO:0009611~response to wounding	13	2.76571	CXCL5, CFB, CXCL3, TGFBR2, PROC, NLRC4, C4BP, NUPR1, CCL20, LBP, SERPIND1, CFI, CD14
GO:0006325~chromatin organization	12	2.60874	H1F0, ING4, HIST1H2BC, HIST1H2BG, HIST1H2BM, HIST2H2BE, RNF2, HIST1H2BJ, HIST1H3A, HIST1H2AI, HIST1H3B, HIST1H3C, HIST3H2A, HIST1H3D, HIST1H4D, HIST1H3E, HIST1H3G, HIST1H4H
GO:0006954~inflammatory response	10	2.60862	NLRC4, C4BP, NUPR1, CXCL5, CCL20, CFB, CXCL3, CFI, LBP, CD14
GO:0042330~taxis	7	2.55903	CXCL5, CCL20, ENPP2, CXCL3, ITGA1, LBP, CCL17
GO:0006935~chemotaxis	7	2.55903	CXCL5, CCL20, ENPP2, CXCL3, ITGA1, LBP, CCL17
GO:0006952~defense response	14	2.29505	IRGM1, CXCL5, CFB, CXCL3, CCL17, TAPBP, NLRC4, C4BP, NUPR1, CCL20, CLEC2D, LBP, CFI, CD14
GO:0051276~chromosome organization	13	2.23304	H1F0, ING4, HIST1H2BC, HIST1H2BG, HIST1H2BM, MAD2L1, HIST2H2BE, RNF2, HIST1H2BJ, HIST1H3A, HIST1H2AI, HIST1H3B, HIST1H3C, HIST3H2A, HIST1H3D, HIST1H4D, HIST1H3E, HIST1H3G, HIST1H4H
GO:0065003~macromolecular complex assembly	11	1.92862	H1F0, HIST1H2BC, HIST1H2BG, TBCE, HIST1H2BM, HIST2H2BE, HIST1H2BJ, HIST1H3A, HIST1H2AI, HIST1H3B, HIST1H3C, HIST1H3D, HIST3H2A, HIST1H4D, HIST1H3E, HIST1H3G, HIST1H4H
GO:0007610~behavior	12	1.81741	MYO6, CXCL5, CCL20, ENPP2, CXCL3, TBCE, ITGA1, ADM2, SEPP1, LBP, APBA1, CCL17
GO:0006955~immune response	13	1.74136	IRGM1, C4BP, CXCL5, CCL20, PPBP, ENPP2, CFB, CXCL3, H2-T23, CFI, LBP, CD14, CCL17
GO:0043933~macromolecular complex subunit organization	11	1.70255	H1F0, HIST1H2BC, HIST1H2BG, TBCE, HIST1H2BM, HIST2H2BE, HIST1H2BJ, HIST1H3A, HIST1H2AI, HIST1H3B, HIST1H3C, HIST1H3D, HIST3H2A, HIST1H4D, HIST1H3E, HIST1H3G, HIST1H4H
GO:0002526~acute inflammatory response	5	1.69574	C4BP, NUPR1, CFB, CFI, LBP
GO:0051186~cofactor metabolic process	7	1.52661	TPK1, GSTA1, HPX, GSTT1, IDH1, GSTT3, PIPOX
GO:0006732~coenzyme metabolic process	6	1.43407	TPK1, GSTA1, GSTT1, IDH1, GSTT3, PIPOX
GO:0045087~innate immune response	5	1.31357	IRGM1, C4BP, CFB, CFI, LBP
